# 1 **Nowcasting epidemic trends using hospital- and community-based vi-** 2 **rologic test data**

3 Tse Yang Lim<sup>1\*</sup>, Sanjat Kanjilal<sup>2,3</sup>, Shira Doron<sup>4</sup>, Jessica Penney<sup>4</sup>, Meredith Haddix<sup>5</sup>, Tae Hee  
4 Koo<sup>5</sup>, Phoebe Danza<sup>5</sup>, Rebecca Fisher<sup>5</sup>, Yonatan H. Grad<sup>1,6†</sup>, James A. Hay<sup>1,7\*†</sup>

5 \*Correspondence to: [tseyanqlim@hsph.harvard.edu](mailto:tseyanqlim@hsph.harvard.edu), [james.hay@ndm.ox.ac.uk](mailto:james.hay@ndm.ox.ac.uk)

6 †These authors jointly supervised the work.

7 <sup>1</sup> Center for Communicable Disease Dynamics, Harvard T.H. Chan School of Public Health,  
8 Boston, MA

9 <sup>2</sup> Department of Population Medicine, Harvard Pilgrim Health Care Institute, Boston, MA

10 <sup>3</sup> Department of Infectious Diseases, Brigham and Women's Hospital, Boston, MA

11 <sup>4</sup> Division of Geographic Medicine and Infectious Diseases, Tufts Medical Center, Boston, MA

12 <sup>5</sup> Disease Control Bureau, Los Angeles County Department of Public Health, Los Angeles, CA

13 <sup>6</sup> Department of Immunology and Infectious Diseases, Harvard T.H. Chan School of Public  
14 Health, Boston, MA

15 <sup>7</sup> Pandemic Sciences Institute, Nuffield Department of Medicine, University of Oxford, Oxford,  
16 UK

## 17 **Abstract**

18 Epidemiological surveillance typically relies on reported incidence of cases or hospitalizations,  
19 which can suffer significant reporting lags, biases and under-ascertainment. Here, we evaluated  
20 the potential of viral loads measured by RT-qPCR cycle threshold (Ct) values to track epidemic  
21 trends. We used SARS-CoV-2 RT-qPCR results from hospital testing in Massachusetts, USA,  
22 municipal testing in California, USA, and simulations to identify predictive models and covariates  
23 that maximize short-term epidemic trend prediction accuracy. We found SARS-CoV-2 Ct value  
24 distributions correlated with epidemic growth rates under real-world conditions. We fitted gener-  
25 alized additive models to predict log growth rate or direction of reported SARS-CoV-2 case inci-  
26 dence using features of the time-varying population Ct distribution and assessed the models' abil-  
27 ity to track epidemic dynamics in rolling two-week windows. Observed Ct value distributions ac-  
28 curately predicted epidemic growth rates (growth rate RMSE ~ 0.039-0.052) and direction (AUC  
29 ~ 0.72-0.78). Performance degraded during periods of rapidly changing growth rate. Predictive  
30 models were robust to testing regimes and sample sizes; accounting for population immunity or  
31 symptom status yielded no substantial improvement. Trimming Ct value outliers improved perfor-  
32 mance. These results indicate that analysis of Ct values from routine PCR tests can help monitor  
33 epidemic trends, complementing traditional incidence metrics.

## 34 Introduction

35 Epidemic monitoring and outbreak surveillance are vital public health functions, providing early  
36 warning of emerging threats, informing healthcare capacity planning and transmission control pol-  
37 icies, and helping to evaluate the effectiveness of interventions<sup>1-4</sup>. A common approach to epi-  
38 demic monitoring, exemplified during the COVID-19 pandemic, is to track the incidence of re-  
39 ported positive diagnostic tests, clinical cases<sup>5,6</sup>, or deaths<sup>7</sup>. These data can inform key statistics  
40 such as the epidemic growth rate or effective reproductive number<sup>8-11</sup> and are fundamental to  
41 nowcasting and forecasting an epidemic's trajectory<sup>12-14</sup>. However, these data streams can be  
42 substantially lagged, biased, and incomplete due to testing delays, capacity limitations, cost, and  
43 changing test-seeking behavior<sup>15,16</sup>. Thus, there has been growing interest in alternative data  
44 sources, such as wastewater surveillance<sup>17,18</sup>, internet search trends<sup>19</sup>, and digital contact trac-  
45 ing<sup>20</sup>, that do not depend on large-scale testing of individuals,.

46 A novel data source for epidemic monitoring described during the COVID-19 pandemic is the  
47 population-level distribution of viral loads among infected individuals, approximated using cycle  
48 threshold (Ct) values from reverse-transcription quantitative polymerase chain reaction (RT-  
49 qPCR) testing<sup>21-24</sup>. For certain acute respiratory viruses such as SARS-CoV-2, a low Ct value  
50 (high viral load) typically suggests that an individual was sampled early in their infection, whereas  
51 a high Ct value (low viral load) measurement suggests sampling later in infection<sup>25-27</sup>. Thus, a  
52 population-level sample of predominantly low Ct values (high viral loads) indicates that most sam-  
53 pled infections are of recent onset, corresponding to a growing epidemic, whereas a sample of  
54 predominantly high Ct values (low viral loads) corresponds to a declining epidemic consisting of  
55 mostly late infections and post-infectious viral persistence<sup>21</sup>. Unlike count-based surveillance  
56 methods, estimating epidemic growth rate based on the distribution of measured viral loads does  
57 not depend on the number of positive tests.

58 Multiple studies have reported on the feasibility of using population-level Ct values to track SARS-  
59 CoV-2 epidemic trends,<sup>28–38</sup> though it remains unclear under which conditions they are a practical  
60 source of epidemiological information. While the relationship between sampled viral loads, viral  
61 kinetics, and epidemic dynamics can be described mathematically under ideal conditions, in prac-  
62 tice there are several factors which complicate its application as a practical epidemic monitoring  
63 tool. Measured Ct values are determined by a combination of biological factors, such as immuno-  
64 logical history and variant causing the infection<sup>39–41</sup>, and practical factors such as whether individ-  
65 uals are tested at a random point in their infection (e.g., asymptomatic screening) or around the  
66 time of peak viral load prompted by symptom onset<sup>42</sup>, demography of the tested population<sup>43</sup>,  
67 sample type<sup>44</sup>, and RT-qPCR platform<sup>45</sup>. Whether these factors are prohibitively confounding  
68 when using Ct value distributions for epidemic monitoring has yet to be explored.

69 Here, we investigated the real-world feasibility of using SARS-CoV-2 Ct values to nowcast epi-  
70 demic trajectories over three years of the COVID-19 pandemic. We first used synthetic datasets  
71 to benchmark nowcasting model performance and examined biological and logistical factors that  
72 might impede or improve nowcast accuracy. We then applied the same models to three real  
73 SARS-CoV-2 RT-qPCR testing datasets, collected across multiple geographic areas in the United  
74 States and under different population sampling strategies, to assess and inform the use of this  
75 approach in real-time estimation of epidemic growth rates.

## 76 **Results**

### 77 *Correlation between epidemic growth rates and Ct value statistics using synthetic datasets*

78 To understand how biological and practical factors might affect Ct-based nowcasting perfor-  
79 mance, we created several synthetic Ct value datasets using real population-level reported inci-  
80 dence curves for Massachusetts, USA, combined with a viral kinetics model parameterized by  
81 longitudinal SARS-CoV-2 viral kinetics data, and sampling regimes representing a mixture of  
82 symptom-driven testing and asymptomatic screening (see Methods). Using synthetic datasets in  
83 this way allowed us to incorporate or exclude the effects of certain confounding factors on ob-  
84 served population-level Ct value distributions, in addition to the effect of the epidemic trajectory  
85 itself (see **Table S1**).

86 We first simulated an ideal dataset assuming: 1) highly asymmetric viral kinetics, with a very short  
87 growth phase and longer clearance phase; 2) low variation in observed viral load/Ct value for a  
88 given time-since-infection; and 3) a uniform probability of sampling an individual at any number  
89 of days after infection or symptom onset. We varied each of these factors in turn, resulting in four  
90 alternative scenarios with either: 1) increased symmetry in viral kinetics, with a more similar  
91 growth and clearance phase duration; 2) moderate variation in observed viral load/Ct value for a  
92 given time-since-infection; 3) a low-variance, gamma-distributed delay between infection or symp-  
93 tom onset and sampling; and 4) a realistic baseline scenario combining all three factors (see  
94 **Supplementary Text 1**).

95 All the synthetic datasets showed a clear negative correlation between the 7-day rolling average  
96 epidemic growth rate of cases and 7-day rolling average mean Ct value from the simulated symp-  
97 tomatic and asymptomatic samples, though the realistic baseline scenario showed the weakest  
98 correlation (**Figure S1**). Ct values from both symptom-based and random testing showed a rela-  
99 tionship with epidemic growth rate (**Figure S1**), though Ct values observed through symptom-  
100 based testing were typically lower and exhibited less variation.

101 With each synthetic dataset, we fit generalized additive models (GAM) with smoothing splines to  
102 predict growth rates of cases as a non-linear function of daily mean and skewness of observed  
103 Ct values. We also fit corresponding logistic GAMs to predict the epidemic direction, i.e., whether  
104 incidence is growing or declining. We assessed in-sample fits of model-predicted vs. observed  
105 growth rates and direction across the entire dataset, based on RMSE and AUC respectively. We  
106 then refit the models using separate training and testing subsets of the data. To approximate a  
107 realistic application of the Ct-based approach in an ongoing epidemic, we fit the models using  
108 only the first 16 weeks of data and then performed rolling nowcasts with a two-week time horizon,  
109 using the fitted model to estimate the epidemic growth rate and direction daily over the next two  
110 weeks based on the Ct values reported during that time. At the end of each two-week window, we  
111 re-fit the model using all Ct values and incidence data up to that time point, then nowcast the next  
112 two-week window, and so on. As a sensitivity analysis, we compared RMSE and AUC with a fixed  
113 train-test split date at the end of 2021 (**Table S2**).

114 With the ideal synthetic dataset, the GAMs closely tracked observed growth rates using Ct value  
115 means and skew (**Figure S2 & Figure S3**; in-sample RMSE = 0.0191, approximately 10% of the  
116 range in observed log incidence growth rates), as well as accurately predict epidemic direction  
117 (in-sample AUC = 0.916). Nowcast accuracy over a rolling two-week window was slightly worse  
118 than the in-sample predictive performance (mean across all nowcast windows, RMSE = 0.0206,  
119 AUC = 0.867) but was still able to accurately track the epidemic over the full time period (**Figure**  
120 **1**).

121 Model predictive performance was worse when using the realistic baseline synthetic dataset (**Fig-**  
122 **ure 1, Figure S2 & Figure S3**; in-sample RMSE = 0.0319, AUC = 0.78; nowcast RMSE = 0.042,  
123 AUC = 0.698). The three factors examined individually had similar impacts on model performance;  
124 asymmetry of viral load trajectories caused the greatest increase in RMSE but only a slight de-  
125 crease in AUC, while the distribution of delays between infection and sampling caused the

126 smallest increase in RMSE but the largest decrease in AUC (**Figure 1, Table 1**). When these  
127 models were applied to nowcasting growth rates in two-week increments, the greatest perfor-  
128 mance reduction occurred when increasing the individual variation in Ct values for a given time-  
129 since-infection (**Table 1**).

130 **Table 1.** Predictive performance of GAMs using synthetic datasets, predicting per-day growth  
131 rates from daily Ct value statistics.

| <b>Dataset</b>      | <b>RMSE, in-<br/>sample</b> | <b>RMSE, now-<br/>cast</b> | <b>AUC, in-<br/>sample</b> | <b>AUC, now-<br/>cast</b> |
|---------------------|-----------------------------|----------------------------|----------------------------|---------------------------|
| Ideal condition     | 0.0191                      | 0.0206                     | 0.916                      | 0.867                     |
| Realistic kinetics  | 0.0245                      | 0.0286                     | 0.889                      | 0.841                     |
| Realistic variation | 0.024                       | 0.0302                     | 0.878                      | 0.822                     |
| Realistic sampling  | 0.0237                      | 0.027                      | 0.865                      | 0.824                     |
| Baseline condition  | 0.0319                      | 0.042                      | 0.78                       | 0.698                     |

132

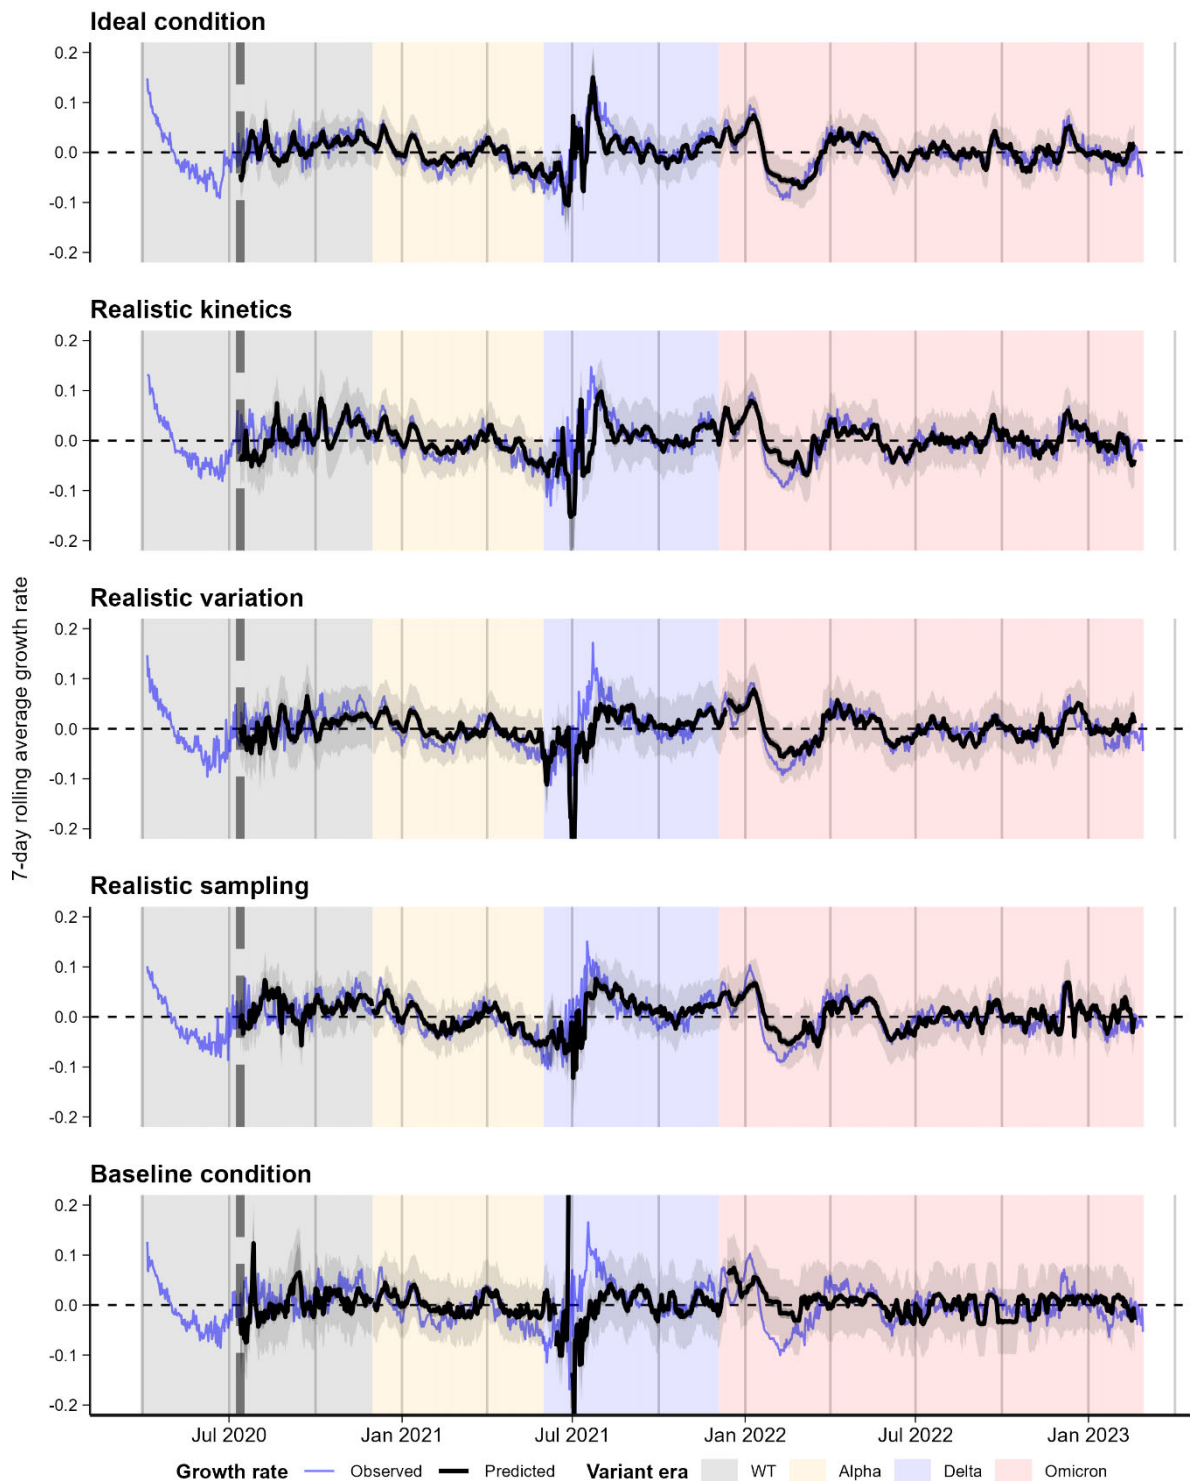



139 *Real-world relationship between observed Ct-value statistics and epidemic trajectories*

140 Having established a baseline for model nowcasting performance using the synthetic data, we  
141 next tested the nowcasting models on two RT-qPCR datasets: 1) routine hospital testing data from  
142 the Mass General Brigham hospital system in eastern Massachusetts (MGB), spanning Mar 2020-  
143 Feb 2023, and 2) municipal testing data from Los Angeles County, California (LAC), spanning  
144 May 2020-Jul 2021 and Jan-Sep 2022. The MGB data came largely from mandatory screening  
145 testing of outpatient, inpatients and emergency room admissions, while the LAC data were pri-  
146 marily symptom-driven voluntary testing (see Methods and **Table S3**). Both datasets contained  
147 specimen collection dates and Ct values for SARS-CoV-2 positive results; LAC data also included  
148 vaccination status, symptom status, and symptom onset dates. MGB Ct values came from seven  
149 platform/assay combinations, while Ct values from LAC data came from one PCR platform with  
150 two possible assays (see Methods).

151 We limited our analysis to tests reporting Ct values, using the first available recorded Ct value for  
152 each infection episode (see Methods). The final analyzed sample included 104,534 (MGB) and  
153 279,492 (LAC) Ct values. We also applied our method to a third, smaller set of testing data from  
154 the Tufts Medical Center, also in eastern Massachusetts, with a total sample of 10,214 Ct values.  
155 We compared these Ct values against reported COVID-19 incidence for Massachusetts (MGB  
156 and Tufts) and Los Angeles County (LAC). We segment the data into four ‘variant eras’ based on  
157 the SARS-CoV-2 variant known or believed to be dominant in the U.S. during different approxi-  
158 mate time periods, to allow for differences in viral kinetics by variant (see Methods).

159 Ct value distributions from both MGB and LAC datasets showed substantial variation over the  
160 course of the pandemic (**Figure 2A & Figure 3A**). Reported COVID-19 incidence in both locations  
161 varied over time as well (**Figure 2B & Figure 3B**), with large infection waves in the winters of  
162 2020-21 and 2021-22, though the pattern of incidence was not synchronized across both settings.

163 While absolute incidence varied widely, incidence growth rates remained largely between  $\pm 0.2$   
164 throughout the course of the pandemic (**Figure 2B & Figure 3B**).

165 We found the mean and skewness of observed Ct value distributions (calculated daily over a  
166 seven-day moving window and excluding days with fewer than 10 Ct values reported) correlated  
167 with the growth rate in reported incidence (**Figure 2C & Figure 3C**). Analysis of cross-correlation  
168 functions found Ct value distributions lagged incidence growth rate in the MGB data, with strong-  
169 est correlations at around 19-days lag (autocorrelation function, ACF = -0.462), and led incidence  
170 growth rates for the LAC data, with strongest correlations at around 10-days lead (ACF = -0.062)  
171 (**Figure S4 & Figure S5**). However, for real-time nowcasting, we focused on the relationship be-  
172 tween same-day Ct values and incidence (i.e., lag=0 days; **Figure 2C & Figure 3C**), which still  
173 showed high correlation. Higher incidence growth rates corresponded with lower same-day aver-  
174 age Ct values (Spearman's correlation coefficient: MGB Rho = -0.43, LAC Rho = -0.22) and with  
175 positively skewed Ct distributions (MGB Rho = 0.35, LAC Rho = 0.43).

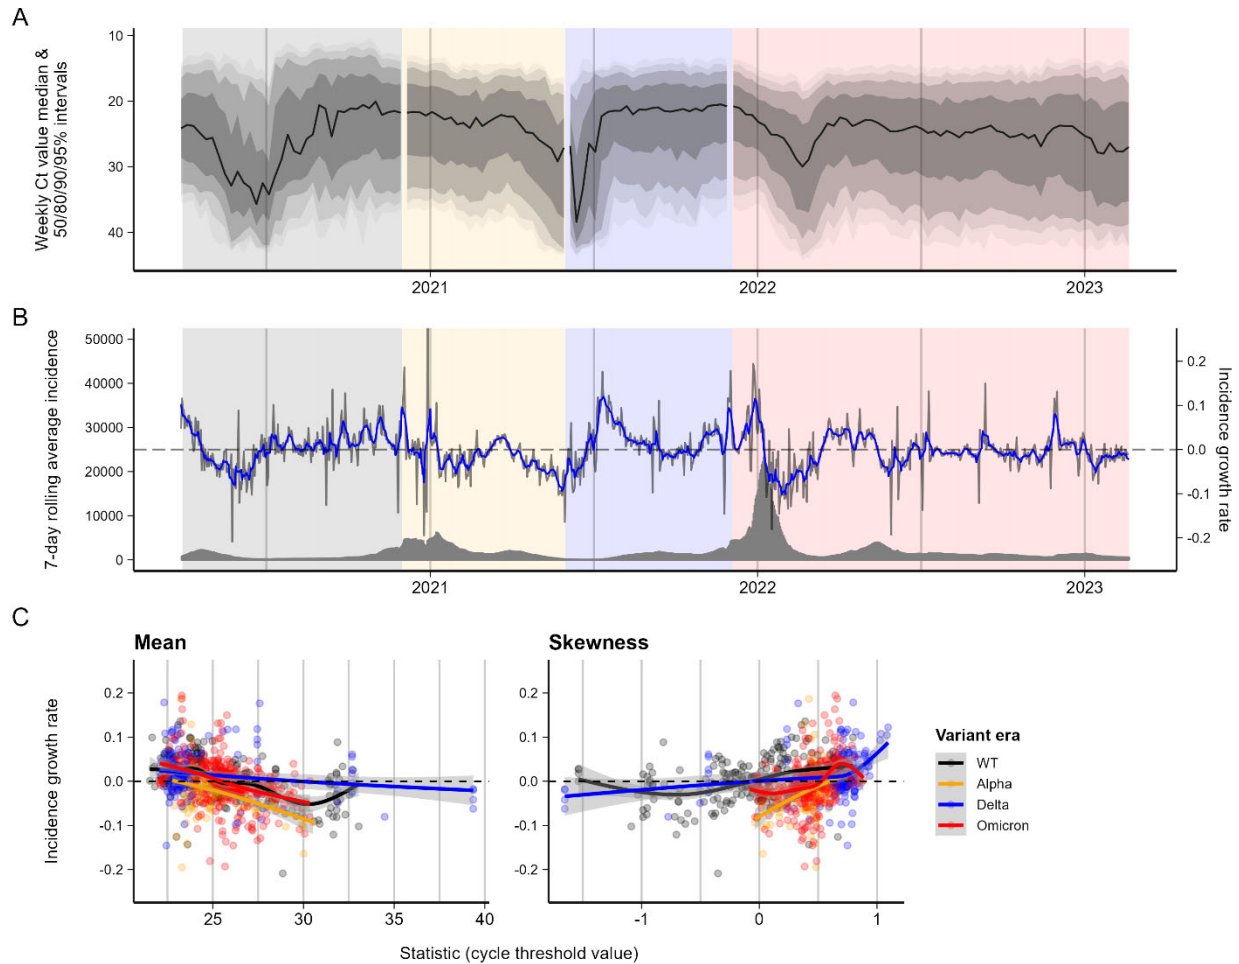

176

177 **Figure 2.** Ct values from the Mass General Brigham hospital system and corresponding reported  
178 COVID-19 incidence in Massachusetts, USA. **(A)** Weekly Ct value quantiles over time, showing  
179 weekly median Ct value and 50/80/90/95% quantiles. **(B)** 7-day rolling average reported incidence  
180 (grey bars), growth rate in 7-day rolling average reported incidence (grey line), and smoothed  
181 growth rate (blue line). Background is shaded by time periods of different variant dominance.  
182 Vertical dashed line demarcates the test-train split. **(C)** Incidence growth rate compared to  
183 smoothed daily mean and skewness of Ct value distributions. Colored lines and shaded grey  
184 regions show fitted cubic spline GAMs with 95% confidence intervals, stratified by period of variant  
185 dominance.

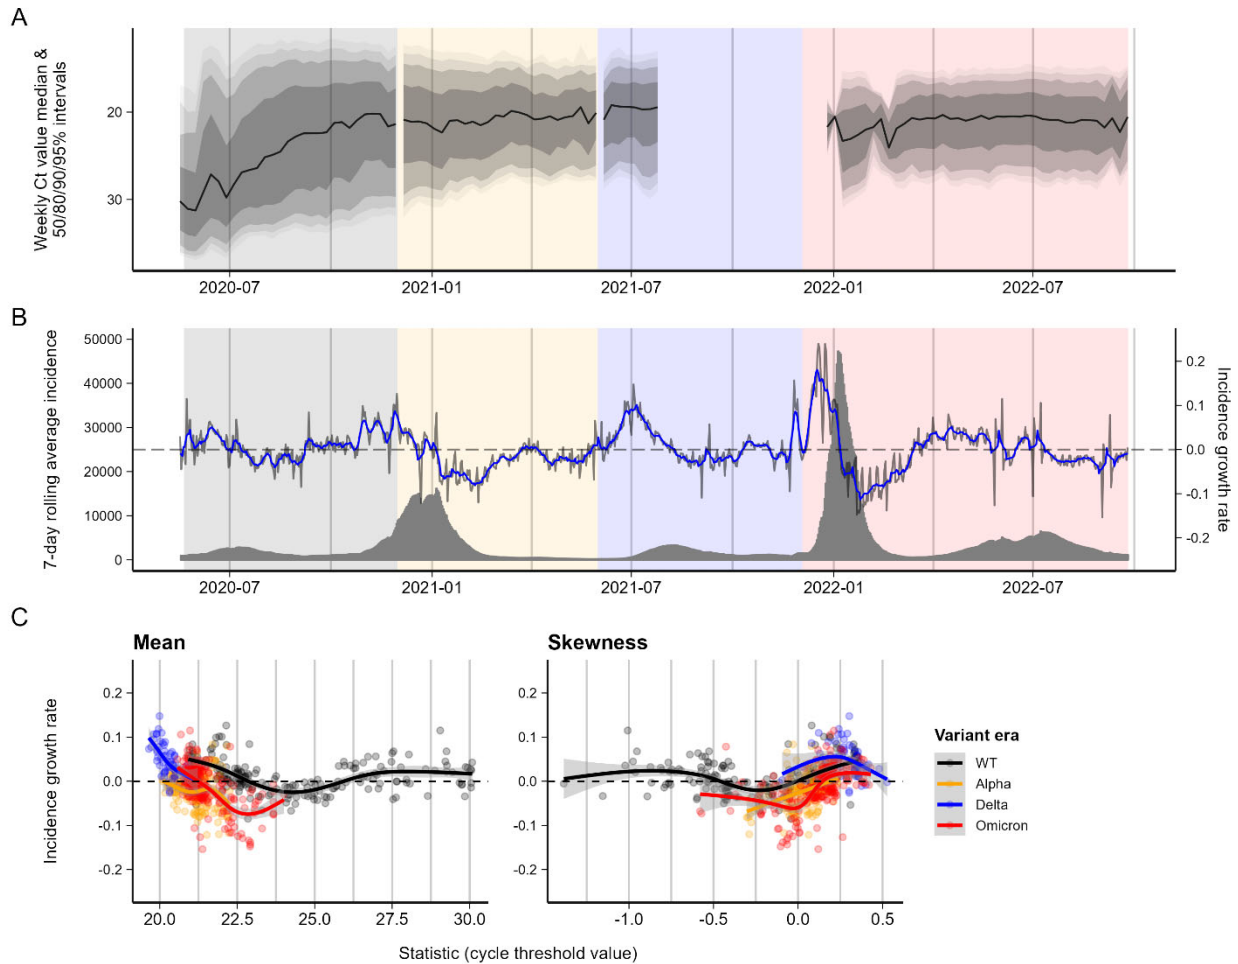

186

187 **Figure 3.** Ct values from Los Angeles County and corresponding reported COVID-19 incidence.  
188 (A) Weekly Ct value quantiles over time, showing weekly median Ct value and 50/80/90/95%  
189 quantiles. (B) 7-day rolling average reported incidence (grey bars), growth rate in 7-day rolling  
190 average reported incidence (grey line), and smoothed growth rate (blue line). Background is  
191 shaded by time periods of different variant dominance. Vertical dashed line demarcates the test-  
192 train split. (C) Incidence growth rate compared to smoothed daily mean and skewness of Ct value  
193 distributions. Colored lines and shaded grey regions show fitted cubic spline GAMs with 95%  
194 confidence intervals, stratified by period of variant dominance.

195 *Nowcasting epidemic growth rates using Ct values in Massachusetts, USA and Los Angeles*  
196 *County, USA*

197 We next re-trained the same GAM models used with synthetic data to the MGB and LAC dataset  
198 using smooth functions of mean and skewness of Ct values to predict log incidence growth rates,  
199 with corresponding logistic models to predict epidemic direction. Model predictions were com-  
200 pared against observed values first in-sample across the entire dataset then over a rolling two-  
201 week nowcast window, as well as with a single fixed train-test split date at the end of 2021.

202 In both datasets, this simple model achieved in-sample prediction accuracy for incidence growth  
203 rate only slightly worse than performance on the realistic synthetic data, with relatively small ab-  
204 solute errors (MGB RMSE = 0.0451; LAC RMSE = 0.0335, see **Figure S6-S9, Table S4,** and  
205 **Table 2**). Corresponding logistic regression models successfully discriminated growing from de-  
206 clining incidence (Area under the curve: MGB AUC = 0.785, LAC AUC = 0.843).

207 The models were able to nowcast growth rates, in two-week increments with models periodically  
208 refitted to more recent data, with accuracy slightly worse than in-sample model fits (MGB RMSE  
209 = 0.0523, LAC RMSE = 0.039) (**Figure 4A & Figure 5A**). This level of nowcast accuracy was  
210 likewise only slightly worse than nowcasting performance with realistic synthetic data. While av-  
211 erage prediction error was relatively small, comparable to in-sample model error and to prediction  
212 error with realistic synthetic data, accuracy was highly variable from one two-week window to the  
213 next (**Figure 4B & Figure 5B**). Nowcast accuracy was comparable to model performance over a  
214 fixed multi-month prediction window, slightly better for one dataset and worse for the other (MGB  
215 RMSE = 0.047, LAC RMSE = 0.0458) (**Table S2**). Nowcast predictions of epidemic direction were  
216 slightly worse than in-sample ones (MGB AUC = 0.723, LAC AUC = 0.784) and outperformed the  
217 directional discrimination test with realistic synthetic data. In addition, over all two-week nowcast  
218 windows combined, model-predicted growth rates correlated moderately well with observed ones  
219 (Spearman's Rho: MGB Rho = 0.398, LAC Rho = 0.556).

220 **Table 2.** Predictive performance of the selected GAM using data from MGB and LAC, predicting  
221 per-day growth rates from daily Ct value statistics.

| <i>Dataset</i> | <b>RMSE</b> |         |                                        | <b>AUC</b> |         |                                        |
|----------------|-------------|---------|----------------------------------------|------------|---------|----------------------------------------|
|                | In-sample   | Nowcast | Periods of rapid change in growth rate | In-sample  | Nowcast | Periods of rapid change in growth rate |
| <i>MGB</i>     | 0.0451      | 0.0523  | 0.0645                                 | 0.785      | 0.723   | 0.722                                  |
| <i>LAC</i>     | 0.0335      | 0.039   | 0.0471                                 | 0.843      | 0.784   | 0.772                                  |

222

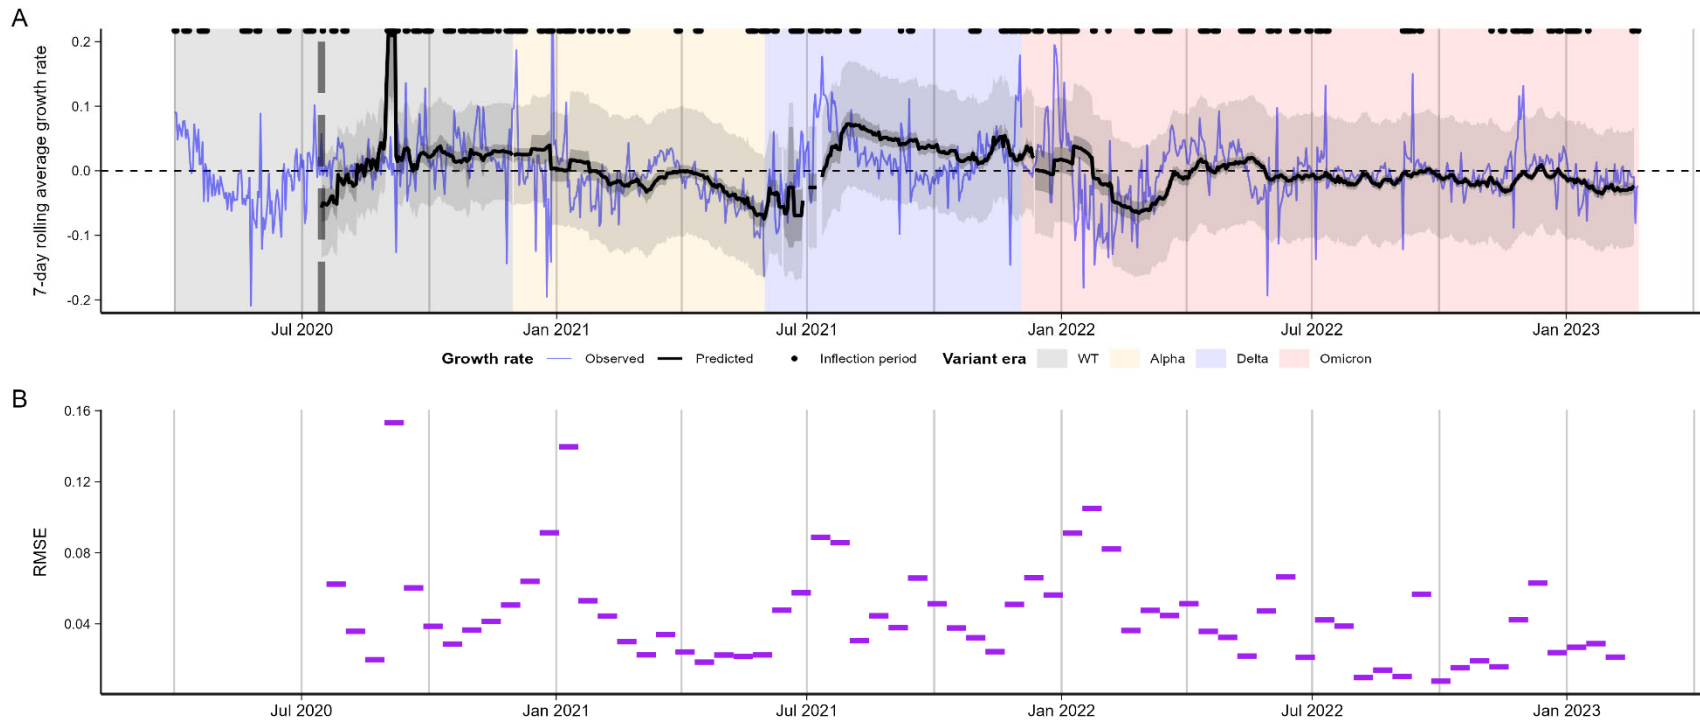

223

224 **Figure 4. (A)** Model-predicted (black) vs. observed (blue) log incidence growth rates for MGB data, with 95% confidence intervals  
225 (dark shading) and 95% prediction intervals (light shading). **(B)** RMSE of predicted vs. observed log incidence growth rates for each 2-  
226 week nowcasting window. “Inflection periods” refer to times when the absolute smoothed log incidence growth rate exceeded 0.025  
227 over a one-week period, marked with points above each subplot.

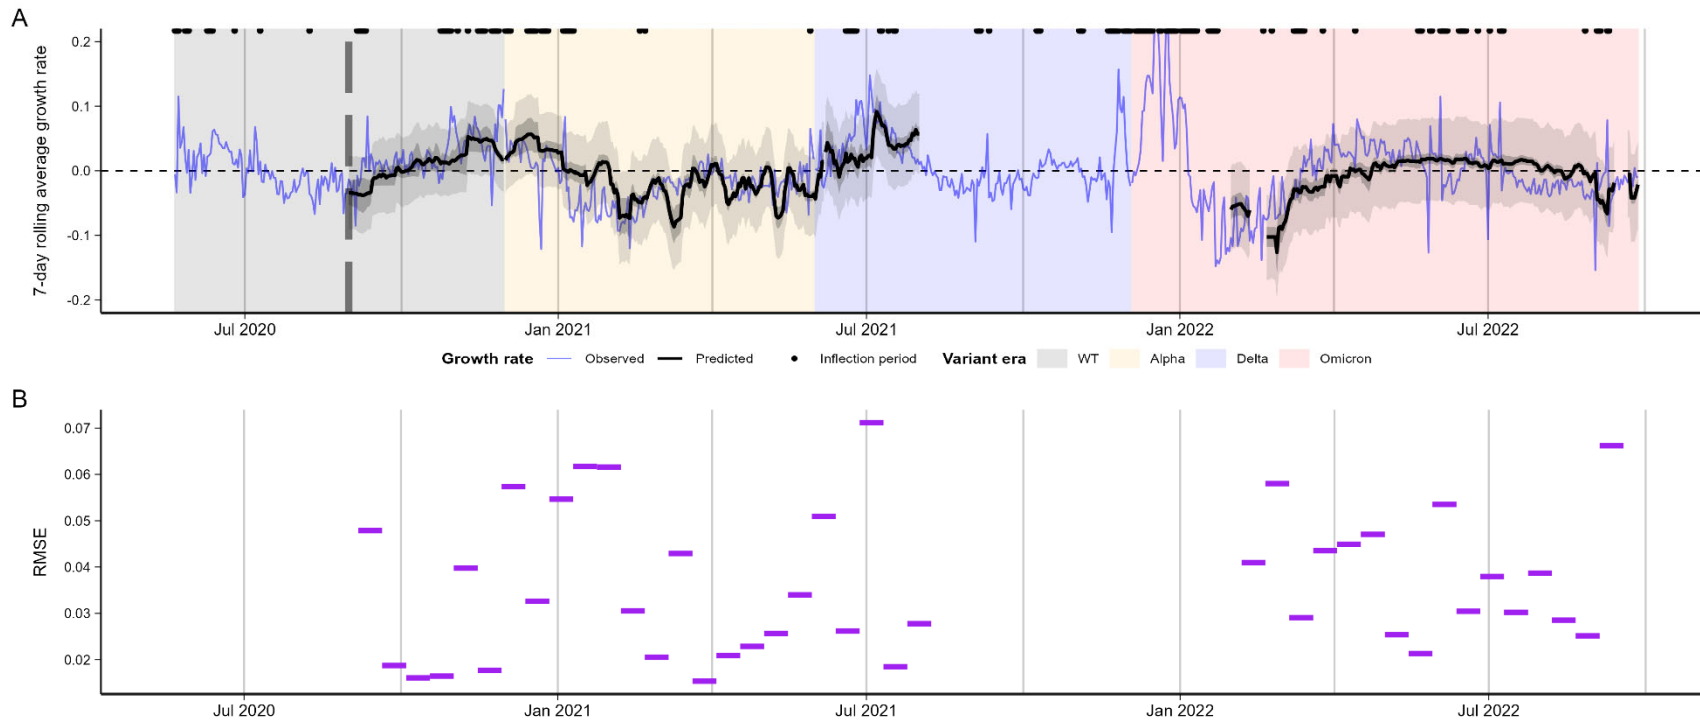

228

229 **Figure 5. (A)** Model-predicted vs. observed log incidence growth rates and RMSEs for LAC data. Model-predicted (black) vs. observed  
 230 (blue) log incidence growth rates for MGB data, with 95% confidence intervals (dark shading) and 95% prediction intervals (light shad-  
 231 ing). **(B)** RMSE of predicted vs. observed log incidence growth rates for each 2-week nowcasting window. “Inflection periods” refer to  
 232 times when the absolute smoothed log incidence growth rate exceeded 0.025 over a one-week period, marked with points above each  
 233 subplot.



234 *Nowcasting performance during time periods of rapid change in growth rate*

235 To assess nowcasting performance during periods of rapid change in the epidemic trajectory, we  
236 identified times when the absolute smoothed incidence growth rate exceeded 0.025 over a one-  
237 week period. This definition captured 30.1% of nowcast dates for the MGB data (284/944 days)  
238 and 17.5% for LAC (98/560 days). We then recalculated in-sample and out-of-sample prediction  
239 accuracy for growth rate and epidemic direction during just these periods.

240 Across both datasets, prediction error over periods of rapid change was greater than over the  
241 whole nowcast period (MGB RMSE = 0.0645 [change] vs. 0.0523 [nowcast], LAC RMSE = 0.0471  
242 [change] vs. 0.039 [nowcast]; see **Table 2**). However, directional prediction accuracy was com-  
243 parable between periods of rapid change and the whole nowcast period (MGB AUC = 0.722 vs.  
244 0.723, LAC AUC = 0.772 vs. 0.784).

245 *Nowcasting performance with variable sample size and outlier removal*

246 We assessed the sensitivity of nowcasting performance to sample size both by randomly  
247 downsampling the MGB dataset (100 random draws) and by analyzing a third, smaller dataset  
248 from Tufts Medical Center using the same response variable (i.e., log incidence growth rates for  
249 Massachusetts) but with approximately 10% of the total sample size of the MGB data (see Meth-  
250 ods; **Figure S10, S11**). In most cases, prediction accuracy for incidence growth rate was compa-  
251 rable with the downsampled datasets and the equivalent full datasets (**Figure 6**; see also **Table**  
252 **S5**). Only with 10% of the full dataset (but not with the Tufts dataset) did nowcasting accuracy  
253 degrade appreciably; with 50-75% downsampling or a daily maximum of 25 positive samples,  
254 accuracy improved compared to baseline. Likewise, directional prediction accuracy was generally  
255 similar between downsampled and full datasets, with substantially worse accuracy only for the  
256 10% downsample. Improved accuracy may reflect reduced influence of outliers – downsampling  
257 the full dataset tends to exclude the days with smallest sample sizes, which are otherwise given  
258 equal weight in model training to days with more observations, while sub-sampling each day's

259 observations reduces the impact of outliers on each day's observed Ct value distribution. To test  
 260 this, we examined model performance with trimming of outlier Ct values from each day's observed  
 261 data. Trimming outliers reduced prediction error with 2.5%, 5%, and 10% trims (**Figure 6, Table**  
 262 **S5**), while 2.5% and 5% trims also improved directional prediction accuracy.

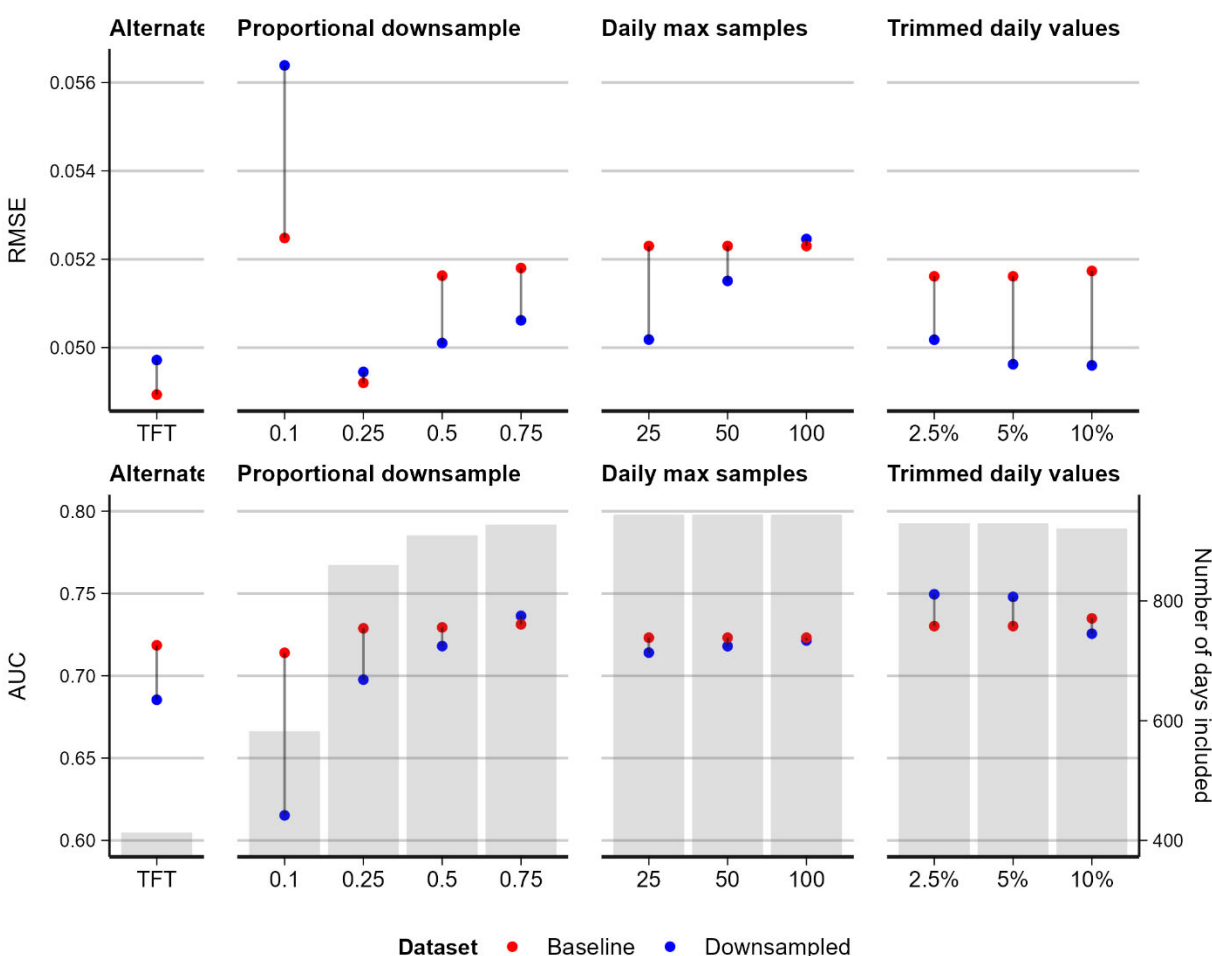

263  
 264 **Figure 6.** Model performance for downsampled MGB and full Tufts datasets. Baseline comparison  
 265 metrics are re-calculated for only the days included in each downsampled dataset's nowcast. For  
 266 proportional and daily max downsampling, both downsampled and baseline performance are av-  
 267 eraged over 100 random draws (and their corresponding days included). Trim percentages indi-  
 268 cate quantiles trimmed from each end of daily Ct value distributions (i.e., 5% trim yields the 5-95  
 269 percentile range of Ct values).

## 270 *Sensitivity analysis*

271 The reason for testing (e.g., symptom driven testing vs. screening asymptomatic outpatients) is  
272 expected to result in different distributions of observed Ct values due to variation in when individ-  
273 uals are tested during their infection; therefore, the relationship between Ct values and epidemic  
274 growth rate is expected to differ correspondingly. In addition, in the MGB data, individuals were  
275 swabbed differently and tested on different PCR platforms depending on their reason for seeking  
276 healthcare, including a mixture of patients tested as outpatients, inpatients and in the emergency  
277 room. To understand the impact of these factors on the modelled relationship between Ct values  
278 and growth rate, we assessed performance of GAMs using only 1) MGB data from routine outpa-  
279 tient screening, the majority of whom were sampled in the same way and tested on the same  
280 PCR platform (**Figure S12**); 2) LAC data stratified by symptom status (symptomatic vs. asymptomatic vs. no known symptom status); 3) LAC data from tests conducted on asymptomatic individuals and those without known symptom status; and 4) LAC data from unvaccinated individuals with no known previous SARS-CoV-2 infection. In all cases, we compared performance to the base model for the respective data source. The relationship between Ct values and growth rate appeared to differ when subsetting or stratifying by these variables (**Figure S13**), but including these stratifications in the model did not always improve predictive performance. Restricting to outpatient tests only improved prediction error compared to baseline (nowcast RMSE = 0.0494 vs. 0.0523 base), whereas incorporating symptom status or immune history slightly worsened prediction error (nowcast RMSE = 0.454 for symptom-stratified, 0.0415 for asymptomatic/no symptom status only, 0.0401 for immunologically naïve only, vs. 0.039 base, see **Table S6**).

## 291 **Discussion**

292 Under real-world conditions, simple generalized additive models using the mean and skewness  
293 of recorded Ct values could nowcast (log) incidence growth rates with prediction errors (RMSE)  
294 of approximately 0.04-0.05. Across both settings (Massachusetts and Los Angeles County),

295 growth rates generally varied between approximately  $\pm 0.2$ , so this level of accuracy in modelled  
296 estimates, while not highly precise, is nonetheless informative. These models are also able to  
297 identify if incidence is growing or shrinking with AUC greater than 0.7, substantially better than  
298 chance.

299 Nowcast accuracy over two-week time horizons is slightly worse than the quality of in-sample  
300 model fits, especially early into the emergence of new dominant viral variants whose effect cannot  
301 yet be accurately estimated. During periods of rapid change in incidence growth rate (e.g., just as  
302 a new outbreak wave is developing), nowcast accuracy for growth rate is slightly worse, possibly  
303 due to larger absolute growth rates during such periods. Crucially, however, directional predictions  
304 remain moderately accurate during those times.

305 Our results support the theoretical expectation that epidemic dynamics influence population-level  
306 viral load distributions, and therefore can be inferred from them<sup>21</sup>. They also corroborate the find-  
307 ings from other settings, where Ct values have been used successfully to infer epidemic growth  
308 rates or reproduction numbers<sup>28–38</sup>. Our analysis builds on these studies with one of the largest  
309 empirical tests of this nowcasting approach to date using data from two locations in the USA over  
310 a three-year period. Epidemic growth rates and directions were accurately nowcasted using both  
311 datasets, despite showing different Ct value trends and capturing different populations, highlight-  
312 ing the generalizability of this approach. Furthermore, these data covered a long-time window and  
313 included periods of different variant dominance and population immunity, suggesting Ct values  
314 could continue to augment infectious disease surveillance as SARS-CoV-2 epidemiology contin-  
315 ues to change.

316 In practice, several factors can confound the relationship between Ct values and epidemic dy-  
317 namics (measured here as growth rate of case incidence), including testing delays, sampling re-  
318 gimes (i.e., community-based random testing vs. testing patients in hospital), symptomatic (diag-  
319 nostic) vs. asymptomatic (screening) testing, immunological history, and the inherent individual-

320 level variability in SARS-CoV-2 viral kinetics. Our synthetic data analyses help disambiguate  
321 these confounding factors by comparing degradation in predictive performance between different  
322 synthetic datasets. Predictive performance was slightly worse in the real datasets compared to a  
323 'realistic' synthetic dataset. One key contributor is that Ct values from the real datasets were col-  
324 lected using multiple RT-qPCR assays and/or platforms and were not standardized and may gen-  
325 erate different Ct values for the same underlying viral load, limiting the comparison of Ct values  
326 across platforms and assays (see Methods)<sup>45-47</sup>. Additionally, the data-generating model for our  
327 'realistic' synthetic dataset did not incorporate the impact of vaccination or past infection which  
328 affect individual viral load trajectories<sup>40,48</sup>, potentially contributing to the differences in performance  
329 between models with empirical vs. synthetic data.

330 Our synthetic data analysis also highlights the importance of considering the delay between in-  
331 fection and sampling an individual in determining the population-distribution of Ct values. Funda-  
332 mentally, the relationship between population-level epidemic dynamics and viral load distributions  
333 arises because individuals' viral loads reflect times since infection<sup>21</sup>, and hence cross-sectional  
334 distributions of viral loads (or Ct values) reflect the distribution of times-since-infection among  
335 currently infected individuals, similar to the relationship between incidence and prevalence. This  
336 relationship can be readily described mathematically if individuals are randomly sampled, with a  
337 uniform probability of sampling any time after infection. Random cross-sectional samples captur-  
338 ing infections at random points in their infection are rare (see <sup>22,31,36,49</sup>) but are reasonably well  
339 approximated in our datasets by routine screening of hospital outpatients. However, a more real-  
340 istic sampling delay distribution – such as if individuals tend to be tested shortly after suspected  
341 exposure or developing symptoms – biases the probability of sampling over time since infection  
342 and dilutes the signal of infection age. Symptom-driven testing where individuals are tested due  
343 to recent symptom onset beginning at around the same time as peak viral load, is the most com-  
344 mon source of data used for epidemiological surveillance, which reduces any epidemic signal in

345 the population-level Ct distribution. In the extreme, if individuals were sampled with the same  
346 delay following infection, then any observed variation in viral loads would arise from random indi-  
347 vidual variation at a single time-since-infection rather than reflecting a distribution of times-since-  
348 infection among current infections. Changes in public health recommendations around testing  
349 and screening algorithms, such as recommendations around pre-travel testing or hospital admis-  
350 sions screening, may therefore change the relationship between population Ct values and epi-  
351 demic dynamics, which may bias Ct-based epidemiological estimates if not accounted for.

352 PCR platform differences and nonrandom sampling regimes are both addressable challenges, at  
353 least in principle. Ct value data could be calibrated across platforms and assays using standard-  
354 ized samples. Random surveillance sampling could reduce the bias in testing delay found with  
355 symptom-driven testing. True random sampling may be important, as voluntary testing by asymp-  
356 tomatic individuals may still show some bias in testing delays (**Table S6**). When we approximated  
357 these changes by subsetting one of our datasets to only results from outpatient screening tests,  
358 which were largely collected and analyzed the same way (**Figure S12**), we found small improve-  
359 ments in model predictive performance compared to using the full, mixed dataset (**Table S6**).  
360 While random surveillance sampling at low prevalence may yield very few infections detected,  
361 nowcasting accuracy was not severely degraded even with substantially reduced sample sizes  
362 (**Figure 6**). Both these changes would improve the accuracy of simple Ct-based nowcasting mod-  
363 els. Even absent such logistical solutions, however, we found the simple statistical heuristic of  
364 trimming outliers (2.5-5%) from daily observed Ct values improves nowcasting accuracy (**Figure**  
365 **6**).

366 Beyond confounding factors, it is plausible that growth rate of reported COVID-19 cases may not  
367 be the most accurate benchmark against which to compare Ct value distributions. First, sympto-  
368 matic cases occur and are reported with a lag relative to infections, and may be affected by  
369 changes in testing behavior, for example with the increased availability of home-based rapid

370 antigen tests. Alternative benchmarks, such as growth rate in hospitalizations, mortality, or  
371 wastewater viral loads, may therefore yield stronger relationships (possibly with some time-shift-  
372 ing); investigating these relationships would be a fruitful avenue for further research. In addition,  
373 geographically aggregated incidence may mask heterogenous outbreak trajectories at finer scale,  
374 e.g., city or even neighborhood level. Such finer-scale incidence data may yield cleaner relation-  
375 ships with Ct value distributions, especially if matched to the catchment areas for the Ct value  
376 data collection process.

377 Another challenge for modeling Ct value dynamics is the choice of mathematical model to capture  
378 the relationship between observed Ct values and underlying epidemic growth rates. The link be-  
379 tween epidemic dynamics and viral loads observed through random cross-sectional surveillance  
380 can be described precisely based on the convolution of the infection incidence curve and viral  
381 kinetics curve<sup>21,31,36</sup>. In contrast, viral loads observed through non-random or convenience sam-  
382 ples, such as symptom-driven testing, arise from complex data generating processes which are  
383 difficult to describe mathematically, and thus past studies, including ours, tend to favor regression  
384 models to estimate epidemic dynamics from observed Ct values<sup>30,33,34</sup>. Future work should focus  
385 on more complex statistical methods that take into account the time-series nature of the data<sup>37</sup>,  
386 the non-linear and potentially non-monotonic relationship between Ct values and growth rates,  
387 and combine multiple data streams to provide more accurate predictions of epidemic dynamics<sup>36</sup>.

388 Tracking epidemic growth rates in near-real-time remains an important challenge for public health  
389 surveillance. Our analyses show that simple Ct-based models can accurately track SARS-CoV-2  
390 epidemic growth rates, highlighting their potential use in augmenting infectious disease surveil-  
391 lance systems. Ultimately, their greatest strength lies in their speed and simplicity. The models  
392 presented here are conceptually straightforward and computationally lightweight, easy to imple-  
393 ment even in resource-constrained settings, and, unlike wastewater testing, are reliant only on  
394 data already routinely collected as part of screening or diagnostic testing. Our analyses show that

395 they retain their accuracy even with limited sample sizes or during periods of rapid change in  
396 epidemic trajectories, such as during the transition from the end of one epidemic wave to the start  
397 of the next one, and so could provide rapid situational awareness as outbreak waves emerge.  
398 Further research could examine how Ct-based estimates of epidemic trajectories complement  
399 other, orthogonal indicators such as wastewater surveillance, as well as potential applications to  
400 different viral pathogens with well-characterized viral kinetics such as influenza or RSV<sup>50,51</sup>.

401



## 402 **Methods**

### 403 *Study settings & data sources*

#### 404 *Massachusetts*

405 Massachusetts Ct value data comes primarily from testing in 16 hospitals in the Mass General  
406 Brigham hospital system, with a catchment area largely in eastern Massachusetts. The full da-  
407 taset comprises 2,671,041 SARS-CoV-2 test results, with specimen collection dates ranging from  
408 3 Mar 2020 to 23 Feb 2023, of which 161,273 were positive. There were 3531 individuals who  
409 appeared to experience repeat infections (defined as >60 days between positive results), of which  
410 72 individuals had 2 or more repeat infections. As we could not rule out long COVID or other  
411 idiosyncratic viral kinetics, we drop these 72 individuals from the final dataset. Limiting to results  
412 reporting Ct values and first reported Ct values for each confirmed case yields the final sample of  
413 104,534 Ct values used in this analysis (**Table S3**), of which the earliest specimens were collected  
414 on 31 Mar 2020.

415 Samples are from a combination of routine outpatient (77,700; 74.3% of samples) and inpatient  
416 (7,311; 7.0%) screening and diagnostic tests, as well as ER patient testing (19,523; 18.7% of  
417 samples); while not entirely random nor representative, routine screening tests suffer less self-  
418 selection bias than symptom-based or voluntary testing. We did not have access to information  
419 on patients' vaccination or infection history, infecting variant, or symptom status.

420 The final sample includes specimens collected from nasal and nasopharyngeal swabs (approx.  
421 2:1 ratio). Specimens were processed using seven different RT-qPCR platform/assay combina-  
422 tions (**Table S3**), variously targeting E/N/N1/N2/ORF1ab genes. For the main analysis here, Ct  
423 values were pooled across platforms/assays; where a single result reported Ct values for multiple  
424 target genes, the lowest value was used.

425 Daily confirmed case counts for Massachusetts were obtained from the Massachusetts Depart-  
426 ment of Public Health COVID-19 dashboard<sup>52</sup>.

427 We also analyzed a secondary dataset of Ct values from Tufts Medical Center in Boston, Massa-  
428 chusetts for comparison. This dataset comprised 84,848 test results with collection dates ranging  
429 from 18 Feb 2021 to 31 Oct 2022, of which 10,338 were positive. Filtering the reported test results  
430 using the same criteria as used for the MGB data yielded a final sample of 10,214 Ct values used  
431 here. **Figure S11** summarizes the reported Ct value distributions over time and compares these  
432 to reported COVID-19 incidence.

### 433 *Los Angeles County*

434 LAC Ct value data comes from municipal COVID-19 testing sites operated by the LAC Depart-  
435 ment of Public Health and Department of Health Services, comprising approximately 10% of all  
436 municipal testing conducted in LAC during the sample period. The full dataset comprises 330,034  
437 SARS-CoV-2 positive test results, with specimens collected over two time periods – 21 May 2020  
438 to 27 Jul 2021, and 30 Dec 2021 to 29 Sep 2022. (Note: data were unavailable for the intervening  
439 period.) The data contain an infection episode identifier; limiting to the first reported Ct value for  
440 each infection episode yields the final sample of 279,492 Ct values used in this analysis.

441 The final sample includes specimens collected through nasal, nasopharyngeal, and oral swabs,  
442 and analyzed by Fulgent Genetics using an in-house platform and ThermoFisher QuantStudio™  
443 6 and 7 PCR systems. Two RT-qPCR assays were used; before mid-Nov 2020, analyses used  
444 exclusively LOINC 94531-1 targeting N1 and N2 genes, while subsequently the majority of anal-  
445 yses used LOINC 94533-7 targeting the N gene. Where a single result reported Ct values for  
446 multiple target genes, the lowest value was used. Symptom status was reported for approximately  
447 75% of the sample, of which in turn approximately 75% (56% of the full sample) are reported as  
448 symptomatic for COVID-19 (**Table S3**). For symptomatic cases, most specimens were collected

449 1-10 days after symptom onset (modal delay of 3 days). The sample also included vaccination  
450 status, with approximately 24% of results coming from vaccinated (partially, fully, or boosted) in-  
451 dividuals (**Table S3**).

452 Daily confirmed case counts were obtained from the LAC DPH COVID-19 dashboard<sup>53</sup>.

### 453 *Synthetic datasets*

454 We built on a previously published model to simulate realistic Ct value distributions that would be  
455 expected under testing and sampling schemes similar to real-world data<sup>21</sup>. Full details of the sim-  
456 ulation framework are given in **Supplementary Text 1**. First, we parameterized a viral kinetics  
457 model describing the expectation and distribution of Ct values over all days following infection  
458 using previously published longitudinal SARS-CoV-2 testing data (**Figure S15, Table S7**)<sup>48</sup>. This  
459 is a piecewise linear model governed by a set of control points determining the time from infection  
460 to peak viral load, time from peak viral load to an inflection point at a high Ct value, and a longer-  
461 term clearance rate with a daily probability of full clearance. Second, we simulated approximately  
462 2 million infections with infection times distributed based on the reported incidence of COVID-19  
463 cases in Massachusetts between 5 March 2020 and 25 Feb 2023. Third, we simulated a surveil-  
464 lance system as a mixture of random testing (i.e., symptom-independent) and symptom-based  
465 testing (individuals are tested with a random delay following a randomly generated incubation  
466 period). Combining these three simulation steps gave a synthetic dataset of Ct values for a mix-  
467 ture of asymptomatic and symptomatic individuals tested at various times post infection and over  
468 a multi-wave SARS-CoV-2 epidemic (**Figure S1**). Different scenarios were captured by changing  
469 the parameters used either for the viral kinetics model or sampling delay distribution (**Figure S16**).

470 *Statistical methods*

471 We calculated daily incidence-based growth rates as the natural log-transformed ratio of 7-day  
472 moving average new reported cases for each day to the 7-day moving average for the preceding  
473 day:

$$474 \quad y_t = \ln \frac{\sum_{k=0}^6 f_{(t-k)}}{\sum_{k=1}^7 f_{(t-k)}}$$

475 where  $y_t$  is incidence growth rate and  $f_t$  is daily incidence at time  $t$ . We defined epidemic direction  
476 as growing when  $y_t > 0$  and declining when  $y_t \leq 0$ .

477 *Classifying time periods of rapid incidence change*

478 To identify periods of rapid change in incidence growth rate, we first smoothed the daily incidence  
479 growth rate (as defined above) using a centered 7-day moving average:

$$480 \quad y'_t = \frac{1}{7} \sum_{k=-3}^3 y_{(t+k)}$$

481 We then identified times when the absolute change in smoothed log incidence growth rate  $y'_t$   
482 equals or exceeds 0.025 over a one-week period, denoting the midpoint days of those weeks as  
483 periods of rapid change. That is, time  $t$  is defined as having rapid change in incidence if and only  
484 if  $|y'_{(t+3)} - y'_{(t-3)}| \geq 0.025$ .

485 *Growth rate & epidemic direction models*

486 We modeled incidence growth rate using a generalized additive model (GAM) incorporating the  
487 mean and skewness of Ct values:

$$488 \quad \ln y_t = \beta_0 + s_{\bar{x}}(\bar{x}_t) + s_g(g_t) + \beta_v v_t$$

489 Where  $s_{\bar{x}}$  and  $s_g$  are smoothing functions fitted using cubic regression splines<sup>54</sup>, and  $\bar{x}_t$  and  $g_t$   
490 are the 7-day rolling averages at time  $t$  of the daily mean and skewness respectively of Ct values

491 from samples collected or over the window from time  $t$  to  $t - 6$ , excluding days with fewer than  
492 10 Ct values reported.  $v_t$  is a categorical variable identifying the SARS-CoV-2 variant known or  
493 believed to be dominant in the U.S. during different approximate time periods. For our datasets,  
494 we designated four such variants / time periods: wild type (up to 30 Nov 2020), Alpha (01 Dec  
495 2020 to 31 May 2020), Delta (01 Jun 2020 to 03 Dec 2021), and Omicron (04 Dec 2021 onwards).  
496 We used this rough approximation rather than relying on more direct and detailed observations,  
497 e.g. sequencing data linked to our datasets, to better represent a realistic use case for the Ct-  
498 based method such as a small municipal public health department. In such cases, resources for  
499 extensive sequencing may not be available, necessitating reliance on broader national trends.  
500 When encountering new variant[s] in a nowcasting or testing period not present in training data,  
501 our models use a realistic decision rule of making predictions based on the last known variant  
502 from training data.

503 We model epidemic direction using logistic regression models equivalent to the GAMs used for  
504 incidence growth rate.

505 To determine our choice of model, we tested a series of log-linear regression models and GAMs,  
506 using different predictors (daily Ct mean, standard deviation, and skewness), functional forms  
507 (log-linear vs. cubic regression splines), and variant interaction terms. We fitted these models to  
508 the baseline synthetic dataset and compared their AIC as well as in-sample and nowcasting per-  
509 formance (see below). There was a clear bias-variance tradeoff between models; more flexible  
510 model specifications yielded better AIC and in-sample fit, at the cost of worse out-of-sample or  
511 nowcasting performance (see **Table S2** and **Figure S14**). We ultimately selected the final model  
512 using mean and skewness with a cubic spline, as the theoretical relationship between cross-  
513 sectional Ct values and epidemic growth rates is non-linear and depends on the *distribution* of Ct  
514 values observed; short of fitting the growth rate model to the entire distribution of observed values,

515 using mean and skewness provides a parsimonious way to include information about the shape  
516 of the distribution in the model.

### 517 *Evaluating model performance*

518 To evaluate the performance of Ct-based nowcasting models, we conducted two model validation  
519 tests. First, we fitted the main models to each dataset using only data up to 31 Dec 2021, then  
520 used the fitted model to predict incidence growth rates and epidemic direction for the remainder  
521 of each dataset (from 01 Jan 2022 onwards), based on observed Ct values reported in each  
522 dataset. We assessed prediction performance using RMSE between model-predicted and ob-  
523 served incidence growth rates, as well as AUC for directional predictions from the logistic regres-  
524 sion model.

525 Next, we conducted a ‘rolling’ nowcast test, intended to simulate a realistic application of this  
526 approach. For each dataset, we trained the main models on the first 16 weeks of available data,  
527 using the models thus fitted to predict incidence growth rates and epidemic direction over the  
528 following 2-week period using only reported Ct value statistics. We then re-fit the models incorpo-  
529 rating those two weeks of incidence data (i.e., up to 18 weeks) and predict the *subsequent 2-*  
530 *week* period, repeating this re-fitting and prediction procedure in 2-week increments up to the end  
531 of each dataset. We report prediction performance as RMSE or AUC across all 2-week prediction  
532 periods concatenated into a single prediction time series for each dataset and model, while de-  
533 tailed period-by-period performance is reported in the online repository at <sup>53</sup>.

### 534 *Impact of reduced sample size and outliers on Ct-based growth rate estimation*

535 As a sensitivity analysis, we repeated the rolling nowcast analyses using artificially down-sampled  
536 datasets. We generated downsampled versions of the dataset in two ways: 1) by randomly draw-  
537 ing 10/25/50/75% of the total test results available, or 2) by limiting the maximum number of pos-  
538 itive test results for each day to 25/50/100, discarding any additional tests. We then reassessed

539 nowcasting performance on each of these downsampled datasets. We repeated this analysis with  
540 100 different randomly downsampled datasets for each size, taking the mean of model perfor-  
541 mance metrics over the 100 draws at each size. We also compared nowcasting performance with  
542 a similar analysis using a third, smaller dataset from Tufts Medical Center, which uses the same  
543 response variable data as the MGB dataset (i.e., log incidence growth rates for Massachusetts)  
544 but has approximately 10% of the total sample size. The downsampling process can result in  
545 some days being excluded from the downsampled dataset model's nowcast. Nowcasting perfor-  
546 mance can vary considerably from day to day, with outlier days having disproportionate impact.  
547 To ensure fair comparison of the impact of downsampling on model accuracy, rather than the  
548 impact of certain days being excluded as an indirect result of the downsampling process, we  
549 recalculated performance metrics for the baseline model's nowcasts based on just the days in-  
550 cluded in any given downsampled model's nowcasts, once again taking the mean of model per-  
551 formance metrics over the 100 different baseline subsets included for each sample size.

552 To assess the impact of outliers on nowcasting performance, we trimmed daily observed Ct value  
553 distributions by 2.5/5/10% (yielding 95/90/80% ranges) before calculating Ct value distribution  
554 statistics, using the trimmed data for both training and nowcasting. Repeat draws were not re-  
555 quired as the trimming is deterministic. As with the downsampling analysis, we recalculated base-  
556 line model performance metrics for only days included at each trim level.

#### 557 *Data & code availability*

558 Data and analysis code are available online at <https://github.com/gradlab/ct-nowcasting> [NOTE:  
559 we will update this to a Zenodo DOI before publication].

#### 560 *Acknowledgements & financial disclosures*

561 JAH is supported by a Wellcome Trust Early Career Award (grant 225001/Z/22/Z). This work was  
562 supported in part by the Francis P. Tally, MD, Fellowship in the Division of Geographic Medicine  
563 and Infectious Disease (JAP). This project has been funded in part by contract 200-2016-91779

564 with the Centers for Disease Control and Prevention (CDC). Disclaimer: The findings, conclu-  
565 sions, and views expressed are those of the authors and do not necessarily represent the official  
566 position of the CDC. The authors also thank Jason Cheng and Hanlin (Harry) Gao of Fulgent  
567 Genetics for assistance with data for the analysis.

568 All authors declare no competing interests. No authors nor our institutions received any payments  
569 or services in the past 36 months from a third party that could be perceived to influence, or give  
570 the appearance of potentially influencing, the submitted work.

#### 571 *Ethics guidelines*

572 The authors declare that all relevant ethical guidelines have been followed and all necessary IRB  
573 and/or ethics committee approvals have been obtained.

#### 574 *Author contributions*

575 TYL, YHG, and JAH conceptualized the project. TYL and JAH designed the analyses, developed  
576 the code, and created the visualizations. TYL, SK, JP, MH, THK, and PD prepared data. SK, SD,  
577 RF, and YHG provided resources and contributed to analysis design and interpretation. YHG pro-  
578 vided primary supervision and funding support. TYL and JAH wrote the first draft. All authors  
579 provided critical review and revision of the text and approved the final version.



## 580 References

- 581 1. Bhatia, S. *et al.* Lessons from COVID-19 for rescalable data collection. *Lancet Infect. Dis.*  
582 **23**, e383–e388 (2023).
- 583 2. Cori, A. *et al.* Key data for outbreak evaluation: building on the Ebola experience. *Philos.*  
584 *Trans. R. Soc. Lond. B Biol. Sci.* **372**, 20160371 (2017).
- 585 3. Lipsitch, M. *et al.* Infectious disease surveillance needs for the United States: lessons from  
586 COVID-19. *arXiv [cs.CY]* (2023).
- 587 4. Lipsitch, M. *et al.* Improving the evidence base for decision making during a pandemic: the  
588 example of 2009 influenza A/H1N1. *Biosecur. Bioterror.* **9**, 89–115 (2011).
- 589 5. <https://ourworldindata.org/covid-cases>.
- 590 6. UKHSA data dashboard. <https://ukhsa-dashboard.data.gov.uk/>.
- 591 7. Flaxman, S. *et al.* Estimating the effects of non-pharmaceutical interventions on COVID-19  
592 in Europe. *Nature* **584**, 257–261 (2020).
- 593 8. Cori, A., Ferguson, N. M., Fraser, C. & Cauchemez, S. A new framework and software to  
594 estimate time-varying reproduction numbers during epidemics. *Am. J. Epidemiol.* **178**, 1505–  
595 1512 (2013).
- 596 9. Parag, K. V., Thompson, R. N. & Donnelly, C. A. Are epidemic growth rates more informative  
597 than reproduction numbers? *J. R. Stat. Soc. Ser. A Stat. Soc.* (2022) doi:10.1111/rssa.12867.
- 598 10. Abbott, S. *et al.* Estimating the time-varying reproduction number of SARS-CoV-2 using  
599 national and subnational case counts. *Wellcome Open Res.* **5**, 112 (2020).
- 600 11. Charniga, K. *et al.* Updating reproduction number estimates for mpox in the Democratic  
601 Republic of Congo using surveillance data. *Am. J. Trop. Med. Hyg.* **110**, 561–568 (2024).
- 602 12. Charniga, K. *et al.* Nowcasting and forecasting the 2022 U.S. mpox outbreak: Support for  
603 public health decision making and lessons learned. *Epidemics* **47**, 100755 (2024).

- 604 13. Günther, F., Bender, A., Katz, K., Küchenhoff, H. & Höhle, M. Nowcasting the COVID-19  
605 pandemic in Bavaria. *Biom. J.* **63**, 490–502 (2021).
- 606 14. Reich, N. G. *et al.* A collaborative multiyear, multimodel assessment of seasonal influenza  
607 forecasting in the United States. *Proc. Natl. Acad. Sci. U. S. A.* **116**, 3146–3154 (2019).
- 608 15. Rahmandad, H., Lim, T. Y. & Sterman, J. Behavioral dynamics of COVID-19: estimating  
609 underreporting, multiple waves, and adherence fatigue across 92 nations. *Syst. Dyn. Rev.*  
610 **37**, 5–31 (2021).
- 611 16. Tsang, T. K. *et al.* Effect of changing case definitions for COVID-19 on the epidemic curve  
612 and transmission parameters in mainland China: a modelling study. *Lancet Public Health* **5**,  
613 e289–e296 (2020).
- 614 17. Huisman, J. S. *et al.* Wastewater-based estimation of the effective reproductive number of  
615 SARS-CoV-2. *Environ. Health Perspect.* **130**, 57011 (2022).
- 616 18. Tisza, M. J. *et al.* Virome sequencing identifies H5N1 avian influenza in wastewater from nine  
617 cities. *bioRxiv* 2024.05.10.24307179 (2024) doi:10.1101/2024.05.10.24307179.
- 618 19. Stolerman, L. M. *et al.* Using digital traces to build prospective and real-time county-level  
619 early warning systems to anticipate COVID-19 outbreaks in the United States. *Sci. Adv.* **9**,  
620 (2023).
- 621 20. Kendall, M. *et al.* Drivers of epidemic dynamics in real time from daily digital COVID-19  
622 measurements. *Science* **385**, (2024).
- 623 21. Hay, J. A. *et al.* Estimating epidemiologic dynamics from cross-sectional viral load  
624 distributions. *Science* **373**, eabh0635 (2021).
- 625 22. Walker, A. S. *et al.* CT threshold values, a proxy for viral load in community sars-cov-2 cases,  
626 demonstrate wide variation across populations and over time. *Elife* **10**, (2021).
- 627 23. Penney, J., Jung, A., Koethe, B. & Doron, S. Cycle threshold values and SARS-CoV-2:  
628 Relationship to demographic characteristics and disease severity. *J. Med. Virol.* **94**, 3978–  
629 3981 (2022).

- 630 24. Sala, E. *et al.* Systematic review on the correlation between SARS-CoV-2 real-time PCR  
631 cycle threshold values and epidemiological trends. *Infect. Dis. Ther.* **12**, 749–775 (2023).
- 632 25. Kissler, S. M. *et al.* Viral dynamics of acute SARS-CoV-2 infection and applications to  
633 diagnostic and public health strategies. *PLoS Biol.* **19**, e3001333 (2021).
- 634 26. Tsang, T. K. *et al.* Influenza A Virus Shedding and Infectivity in Households. *J. Infect. Dis.*  
635 **212**, 1420–1428 (2015).
- 636 27. Brint, M. E. *et al.* Prolonged viral replication and longitudinal viral dynamic differences among  
637 respiratory syncytial virus infected infants. *Pediatr. Res.* **82**, 872–880 (2017).
- 638 28. Harrison, R. E. *et al.* Cycle Threshold Values as Indication of Increasing SARS-CoV-2 New  
639 Variants, England, 2020-2022. *Emerg. Infect. Dis.* **29**, 2024–2031 (2023).
- 640 29. Musalkova, D. *et al.* Trends in SARS-CoV-2 cycle threshold values in the Czech Republic  
641 from April 2020 to April 2022. *Sci. Rep.* **13**, 6156 (2023).
- 642 30. Lin, Y. *et al.* Incorporating temporal distribution of population-level viral load enables real-time  
643 estimation of COVID-19 transmission. *Nat. Commun.* **13**, (2022).
- 644 31. Aguilar Ticona, J. P. *et al.* Extensive transmission of SARS-CoV-2 BQ.1\* variant in a  
645 population with high levels of hybrid immunity: A prevalence survey. *Int. J. Infect. Dis.* **139**,  
646 159–167 (2024).
- 647 32. Andriamandimby, S. F. *et al.* Cross-sectional cycle threshold values reflect epidemic  
648 dynamics of COVID-19 in Madagascar. *Epidemics* **38**, 100533 (2022).
- 649 33. Alizon, S. *et al.* Epidemiological and clinical insights from SARS-CoV-2 RT-PCR crossing  
650 threshold values, France, January to November 2020. *Euro Surveill.* **27**, (2022).
- 651 34. Yin, N. *et al.* Leveraging of SARS-CoV-2 PCR cycle thresholds values to forecast COVID-19  
652 trends. *Front. Med. (Lausanne)* **8**, (2021).
- 653 35. Khalil, A. *et al.* Weekly Nowcasting of New COVID-19 Cases Using Past Viral Load  
654 Measurements. *Viruses* **14**, (2022).

- 655 36. Sharmin, M. *et al.* Cross-sectional Ct distributions from qPCR tests can provide an early  
656 warning signal for the spread of COVID-19 in communities. *Front. Public Health* **11**, 1185720  
657 (2023).
- 658 37. Ahuja, V., Bowe, T., Warnock, G., Pitman, C. & Dwyer, D. E. Trends in SARS-CoV-2 cycle  
659 threshold (Ct) values from nucleic acid testing predict the trajectory of COVID-19 waves.  
660 *Pathology* **56**, 710–716 (2024).
- 661 38. Moro, A. *et al.* Trends in SARS-CoV-2 cycle threshold values in Bosnia and Herzegovina—A  
662 retrospective study. *Microorganisms* **12**, 1585 (2024).
- 663 39. Kissler, S. M. *et al.* Viral dynamics of SARS-CoV-2 variants in vaccinated and unvaccinated  
664 persons. *N. Engl. J. Med.* **385**, 2489–2491 (2021).
- 665 40. Russell, T. W. *et al.* Combined analyses of within-host SARS-CoV-2 viral kinetics and  
666 information on past exposures to the virus in a human cohort identifies intrinsic differences  
667 of Omicron and Delta variants. *PLoS Biol.* **22**, e3002463 (2024).
- 668 41. Fryer, H. R. *et al.* Viral burden is associated with age, vaccination, and viral variant in a  
669 population-representative study of SARS-CoV-2 that accounts for time-since-infection-  
670 related sampling bias. *PLoS Pathog.* **19**, e1011461 (2023).
- 671 42. Hay, J. A., Kennedy-Shaffer, L. & Mina, M. J. Viral loads observed under competing strain  
672 dynamics. *medRxiv* 2021.07.27.21261224 (2021).
- 673 43. Jones, T. C. *et al.* Estimating infectiousness throughout SARS-CoV-2 infection course  
674 Downloaded from. *Science* (2021) doi:10.1126/science.abi5273.
- 675 44. Wyllie, A. L. *et al.* Saliva or nasopharyngeal swab specimens for detection of SARS-CoV-2.  
676 *N. Engl. J. Med.* **383**, 1283–1286 (2020).
- 677 45. Rhoads, D. *et al.* College of American pathologists (CAP) microbiology committee  
678 perspective: Caution must be used in interpreting the cycle threshold (ct) value. *Clin. Infect.*  
679 *Dis.* **72**, e685–e686 (2021).

- 680 46. Arnaout, R. *et al.* The limit of detection matters: The case for benchmarking severe acute  
681 respiratory syndrome Coronavirus 2 testing. *Clin. Infect. Dis.* **73**, e3042–e3046 (2021).
- 682 47. Cuypers, L. *et al.* Nationwide harmonization effort for semi-quantitative reporting of SARS-  
683 CoV-2 PCR test results in Belgium. *Viruses* **14**, 1294 (2022).
- 684 48. Hay, J. A. *et al.* Quantifying the impact of immune history and variant on SARS-CoV-2 viral  
685 kinetics and infection rebound: A retrospective cohort study. *Elife* **11**, (2022).
- 686 49. Elliott, P. *et al.* Rapid increase in Omicron infections in England during December 2021:  
687 REACT-1 study. *Science* **375**, 1406–1411 (2022).
- 688 50. Brainard, J. *et al.* Comparison of surveillance systems for monitoring COVID-19 in England:  
689 a retrospective observational study. *Lancet Public Health* **8**, e850–e858 (2023).
- 690 51. Mellor, J. *et al.* Understanding the leading indicators of hospital admissions from COVID-19  
691 across successive waves in the UK. *Epidemiol. Infect.* **151**, e172 (2023).
- 692 52. <https://www.mass.gov/info-details/covid-19-reporting>.
- 693 53. [http://dashboard.publichealth.lacounty.gov/covid19\\_surveillance\\_dashboard/](http://dashboard.publichealth.lacounty.gov/covid19_surveillance_dashboard/).
- 694 54. MgcV: Mixed GAM computation vehicle with automatic smoothness estimation.  
695 *Comprehensive R Archive Network (CRAN)* [https://cran.r-](https://cran.r-project.org/web/packages/mgcV/index.html)  
696 [project.org/web/packages/mgcV/index.html](https://cran.r-project.org/web/packages/mgcV/index.html).
- 697 55. Singanayagam, A. *et al.* Community transmission and viral load kinetics of the SARS-CoV-2  
698 delta (B.1.617.2) variant in vaccinated and unvaccinated individuals in the UK: a prospective,  
699 longitudinal, cohort study. *Lancet Infect. Dis.* **22**, 183–195 (2022).
- 700 56. lazymcmc. Preprint at <https://github.com/jameshay218/lazymcmc>.

701
