# Supplementary material for: Nowcasting epidemic trends using hospital- and community-based virologic test data
Source: bioRxiv or medRxiv preprint supplement (doi:10.1101/2024.11.01.24316580), 2025-07-21
Supplement: Supplementary file [file media-1.pdf]

1 **Supplementary information**

2 **Nowcasting epidemic trends using hospital- and community-based**  
3 **virologic test data**

4 Tse Yang Lim\*, Sanjat Kanjilal, Shira Doron, Jessica Penney, Meredith Haddix, Tae Hee Koo,  
5 Phoebe Danza, Rebecca Fisher, Yonatan H. Grad†, James A. Hay\*†

6 \*Correspondence to: [tseyanglim@hsph.harvard.edu](mailto:tseyanglim@hsph.harvard.edu), [james.hay@ndm.ox.ac.uk](mailto:james.hay@ndm.ox.ac.uk)

7 †These authors jointly supervised the work.

8 **Table S1.** Factors confounding Ct value inference

| Factor                                                                                                                                                                                                                     | Explanation                                                                                                                                                                                                                                                                                                                                                                                                                                                                                                                                                                                                                                                                                                                                     | Scenario |   |   |   |   |
|----------------------------------------------------------------------------------------------------------------------------------------------------------------------------------------------------------------------------|-------------------------------------------------------------------------------------------------------------------------------------------------------------------------------------------------------------------------------------------------------------------------------------------------------------------------------------------------------------------------------------------------------------------------------------------------------------------------------------------------------------------------------------------------------------------------------------------------------------------------------------------------------------------------------------------------------------------------------------------------|----------|---|---|---|---|
|                                                                                                                                                                                                                            |                                                                                                                                                                                                                                                                                                                                                                                                                                                                                                                                                                                                                                                                                                                                                 | 1        | 2 | 3 | 4 | 5 |
| <i>Biological factors</i>                                                                                                                                                                                                  |                                                                                                                                                                                                                                                                                                                                                                                                                                                                                                                                                                                                                                                                                                                                                 |          |   |   |   |   |
| Inter-individual variation in viral kinetics                                                                                                                                                                               | Individuals' viral loads and viral load trajectories vary substantially, even accounting for immune history, demographic factors, etc.                                                                                                                                                                                                                                                                                                                                                                                                                                                                                                                                                                                                          | 0        | 0 | X | 0 | X |
| Symmetry of viral load trajectory                                                                                                                                                                                          | While the viral growth phase is generally much shorter than the clearance phase, any single viral load measurement could come from either phase <sup>41</sup> .                                                                                                                                                                                                                                                                                                                                                                                                                                                                                                                                                                                 | 0        | X | 0 | 0 | X |
| Impact of immune history on viral kinetics                                                                                                                                                                                 | Past exposure through previous infection, vaccination, or both may result in faster viral clearance <sup>40,48</sup> .                                                                                                                                                                                                                                                                                                                                                                                                                                                                                                                                                                                                                          | 0        | 0 | 0 | 0 | 0 |
| Impact of demographic factors on viral kinetics                                                                                                                                                                            | Older individuals generally have higher viral loads and slower viral clearance than younger ones <sup>43,48</sup> .                                                                                                                                                                                                                                                                                                                                                                                                                                                                                                                                                                                                                             | 0        | 0 | 0 | 0 | 0 |
| Impact of viral variant                                                                                                                                                                                                    | Different SARS-CoV-2 variants may be associated with different viral load trajectories <sup>40,48</sup> .                                                                                                                                                                                                                                                                                                                                                                                                                                                                                                                                                                                                                                       | 0        | 0 | 0 | 0 | 0 |
| <i>Logistical factors</i>                                                                                                                                                                                                  |                                                                                                                                                                                                                                                                                                                                                                                                                                                                                                                                                                                                                                                                                                                                                 |          |   |   |   |   |
| PCR platform / assay                                                                                                                                                                                                       | Ct values are not typically standardized across different PCR platforms and assays <sup>46</sup> ; differences in individual testing protocol (e.g. location swabbed) could contribute further differences in measured viral loads.                                                                                                                                                                                                                                                                                                                                                                                                                                                                                                             | 0        | 0 | 0 | 0 | 0 |
| Testing behavior and sampling regime or delay distribution                                                                                                                                                                 | Cross-sectional Ct value distributions reflect the convolution of the distribution of true infection ages and the sampling delay distribution; if sampling delays are highly clustered (e.g. mostly 3-5 days after infection), observed Ct distributions will reflect primarily individual-level random variation rather than informative variation in infection ages <sup>21</sup> . Sampling regime (e.g. representative random sampling, contact-tracing based sampling, voluntary testing, hospital outpatient screening) would influence the sampling delay distribution – random sampling theoretically results in a uniform delay distribution, while e.g. symptom-driven voluntary testing results in highly clustered sampling delays. | 0        | 0 | 0 | X | X |
| Synthetic data scenarios are numbered as follows:<br>1) Ideal condition, 2) realistic asymmetry in viral kinetics, 3) moderate individual-level variation, 4) clustered sampling delay distribution, 5) realistic baseline |                                                                                                                                                                                                                                                                                                                                                                                                                                                                                                                                                                                                                                                                                                                                                 |          |   |   |   |   |

10 **Table S2.** Comparison of the 24 different models used to model the relationship between daily  
 11 reported Ct value statistics and epidemic growth rates, fitted to the realistic baseline synthetic  
 12 dataset. We tested various combinations of three Ct-value statistics (mean, standard deviation  
 13 and skewness), incorporation of a variant 'era' interaction term (intercept only or intercept and  
 14 coefficient), and different functional forms of the model (log-linear regression or cubic regression  
 15 splines).

| Spline | Model                               | AIC   | RMSE   |        |        | AUC   |       |       |
|--------|-------------------------------------|-------|--------|--------|--------|-------|-------|-------|
|        |                                     |       | In-s.  | Now.   | Inf.   | In-s. | Now.  | Inf.  |
| None   | Mean (no variant era)               | -4151 | 0.034  | 0.0349 | 0.0434 | 0.743 | 0.701 | 0.66  |
| None   | Mean + variant era                  | -4175 | 0.0335 | 0.0374 | 0.0471 | 0.752 | 0.667 | 0.636 |
| None   | Mean * variant era                  | -4230 | 0.0326 | 0.0383 | 0.0507 | 0.763 | 0.694 | 0.602 |
| None   | Mean + st.dev. (no variant era)     | -4159 | 0.0338 | 0.0354 | 0.0442 | 0.75  | 0.696 | 0.651 |
| None   | Mean + st.dev. + variant era        | -4186 | 0.0333 | 0.0379 | 0.0479 | 0.763 | 0.666 | 0.647 |
| None   | (Mean + st.dev.) * variant era      | -4256 | 0.032  | 0.0396 | 0.0525 | 0.78  | 0.686 | 0.605 |
| None   | Mean + skew (no variant era)        | -4149 | 0.034  | 0.0351 | 0.0434 | 0.743 | 0.695 | 0.66  |
| None   | Mean + skew + variant era           | -4174 | 0.0335 | 0.0376 | 0.0472 | 0.752 | 0.66  | 0.638 |
| None   | (Mean + skew) * variant era         | -4227 | 0.0325 | 0.0395 | 0.0519 | 0.764 | 0.683 | 0.604 |
| None   | Mean + s.d. + skew (no variant era) | -4157 | 0.0338 | 0.0358 | 0.0446 | 0.751 | 0.689 | 0.654 |
| None   | Mean + s.d. + skew + variant era    | -4184 | 0.0333 | 0.0383 | 0.0482 | 0.763 | 0.659 | 0.646 |
| None   | (Mean + s.d. + skew) * variant era  | -4255 | 0.0319 | 0.0412 | 0.0534 | 0.783 | 0.677 | 0.604 |
| Cubic  | Mean (no variant era)               | -4229 | 0.0326 | 0.0356 | 0.0466 | 0.755 | 0.715 | 0.668 |
| Cubic  | Mean + variant era                  | -4258 | 0.0321 | 0.0413 | 0.062  | 0.78  | 0.705 | 0.635 |
| Cubic  | Mean * variant era                  | -4296 | 0.0313 | 0.553  | 1.24   | 0.796 | 0.707 | 0.612 |
| Cubic  | Mean + st.dev. (no variant era)     | -4238 | 0.0324 | 0.036  | 0.0476 | 0.763 | 0.709 | 0.662 |
| Cubic  | Mean + st.dev. + variant era        | -4272 | 0.0318 | 0.0414 | 0.0619 | 0.789 | 0.703 | 0.64  |
| Cubic  | (Mean + st.dev.) * variant era      | -4344 | 0.0304 | 0.552  | 1.23   | 0.811 | 0.691 | 0.649 |
| Cubic  | Mean + skew (no variant era)        | -4232 | 0.0325 | 0.0366 | 0.0479 | 0.755 | 0.706 | 0.664 |
| Cubic  | Mean + skew + variant era           | -4261 | 0.0319 | 0.042  | 0.0627 | 0.78  | 0.698 | 0.633 |
| Cubic  | (Mean + skew) * variant era         | -4339 | 0.0303 | 0.554  | 1.24   | 0.8   | 0.682 | 0.602 |
| Cubic  | Mean + s.d. + skew (no variant era) | -4240 | 0.0323 | 0.0371 | 0.0491 | 0.762 | 0.705 | 0.67  |
| Cubic  | Mean + s.d. + skew + variant era    | -4274 | 0.0317 | 0.0422 | 0.0629 | 0.789 | 0.697 | 0.638 |
| Cubic  | (Mean + s.d. + skew) * variant era  | -4379 | 0.0296 | 0.0545 | 0.0926 | 0.814 | 0.672 | 0.649 |

Key: In-s. = in-sample; Now. = nowcast; Inf. = inflection point

17 **Table S3.** Summary characteristics of the SARS-CoV-2 testing datasets.

|                              | <b>MGB</b>                                                                                                                                                                                                                                                                           | <b>LAC</b>                                                                                                                                                                                       | <b>Tufts</b>                                       |
|------------------------------|--------------------------------------------------------------------------------------------------------------------------------------------------------------------------------------------------------------------------------------------------------------------------------------|--------------------------------------------------------------------------------------------------------------------------------------------------------------------------------------------------|----------------------------------------------------|
| Sample size                  | 2,671,041 total<br>161,273 positive<br>104,534 included                                                                                                                                                                                                                              | 330,034 positive<br>279,463 included                                                                                                                                                             | 84,848 total<br>10,338 positive<br>10,214 included |
| Dates                        | Mar 2020-Jan 2023<br>(1022 days)                                                                                                                                                                                                                                                     | May 2020-Jul 2021,<br>Jan-Sep 2022 (680<br>days)                                                                                                                                                 | Feb 2021-Oct 2022<br>(496 days)                    |
| Testing modality             | Hospital outpatient,<br>inpatient, ER                                                                                                                                                                                                                                                | Voluntary outpatient<br>testing                                                                                                                                                                  | Hospital outpatient,<br>inpatient, ER              |
| Platforms/assays             | 7 platforms: Broad in-<br>house assay; Cepheid<br>SARS-CoV-2; Cepheid<br>multiplex SARS-CoV-<br>2/influenza/RSV;<br>Hologic Fusion; Roche<br>Cobas SARS-CoV-2;<br>Roche Cobas multiplex<br>SARS-CoV-2/influenza;<br>Roche Liat multiplex<br>SARS-CoV-2/influenza<br>(see Figure S12) | Fulgent Genetics<br>platform using<br>ThermoFisher<br>QuantStudio™ 6 and<br>7 PCR system, with<br>LOINC 94531-1<br>(primarily to Nov<br>2020) and LOINC<br>94533-7 (primarily<br>after Nov 2020) | Alinity single-plex and<br>Alinity multiplex       |
| Symptom status<br>known?     | No                                                                                                                                                                                                                                                                                   | Yes (approx. 55%<br>symptomatic from<br>Sep 2020 onward)                                                                                                                                         | Yes (approx. 65%<br>symptomatic)                   |
| Vaccination status<br>known? | No                                                                                                                                                                                                                                                                                   | Yes (approx. 25% of<br>all included results;<br>>70% of 2022 results)                                                                                                                            | No                                                 |

| Dataset | AIC   | BIC   | RMSE   |        |        |        | Spearman's Rho |       |       |       | 95% PrI coverage |       |       |       | AUC   |       |       |       |
|---------|-------|-------|--------|--------|--------|--------|----------------|-------|-------|-------|------------------|-------|-------|-------|-------|-------|-------|-------|
|         |       |       | In-s.  | Now.   | Inf.   | FS     | In-s.          | Now.  | Inf.  | FS    | In-s.            | Now.  | Inf.  | FS    | In-s. | Now.  | Inf.  | FS    |
| MGB     | -3493 | -3433 | 0.0451 | 0.0523 | 0.0645 | 0.047  | 0.523          | 0.398 | 0.333 | 0.44  | 0.949            | 0.929 | 0.873 | 0.938 | 0.785 | 0.723 | 0.722 | 0.754 |
| LAC     | -2660 | -2585 | 0.0335 | 0.039  | 0.0471 | 0.0458 | 0.649          | 0.556 | 0.394 | 0.573 | 0.953            | 0.912 | 0.837 | 0.888 | 0.843 | 0.784 | 0.772 | 0.724 |
| TFT     | -1691 | -1649 | 0.0415 | 0.0497 | 0.0591 | 0.0695 | 0.455          | 0.266 | 0.149 | 0.554 | 0.944            | 0.864 | 0.791 | 0.801 | 0.754 | 0.685 | 0.584 | 0.796 |

Key: In-s. = in-sample; Now. = nowcast; Inf. = inflection point; FS = fixed train-test split

19 **Table S4.** Summary of the performance of the chosen model in predicting epidemic growth rates using Ct values for MGB, LAC, and  
20 Tufts datasets, including in-sample fits, nowcast performance, inflection period performance, and fit over the testing period with a single  
21 fixed train-test split. Metrics reported are RMSE of predicted vs. observed log incidence growth rates, Spearman's rank-order correlation  
22 coefficient for predicted vs. observed growth rates, proportion of observed growth rates falling within the 95% prediction interval, and  
23 AUC for epidemic direction predictions.

25 **Table S5.** Summary of model performance metrics for the downsampled MGB and external  
 26 comparison (Tufts) datasets, for nowcast performance and comparable baseline nowcast  
 27 performance. Metrics reported are RMSE of predicted vs. observed log incidence growth rates,  
 28 Spearman’s rank-order correlation coefficient for predicted vs. observed growth rates, proportion  
 29 of observed growth rates falling within the 95% prediction interval, and AUC for epidemic direction  
 30 predictions.

| Dataset                                      | Days included | RMSE   |        | Spearman’s Rho |       | 95% PrI coverage |       | AUC   |       |
|----------------------------------------------|---------------|--------|--------|----------------|-------|------------------|-------|-------|-------|
|                                              |               | Now.   | Comp.  | Now.           | Comp. | Now.             | Comp. | Now.  | Comp. |
| Tufts                                        | 413           | 0.0497 | 0.0489 | 0.266          | 0.348 | 0.864            | 0.937 | 0.685 | 0.719 |
| 10% downsample                               | 582.54        | 0.0564 | 0.0525 | 0.137          | 0.321 | 0.927            | 0.932 | 0.615 | 0.714 |
| 25% downsample                               | 860.02        | 0.0494 | 0.0492 | 0.323          | 0.389 | 0.939            | 0.942 | 0.698 | 0.729 |
| 50% downsample                               | 909.84        | 0.0501 | 0.0516 | 0.373          | 0.4   | 0.936            | 0.936 | 0.718 | 0.729 |
| 75% downsample                               | 927.64        | 0.0506 | 0.0518 | 0.399          | 0.41  | 0.935            | 0.935 | 0.736 | 0.731 |
| 25/day max samples                           | 944           | 0.0525 | 0.0523 | 0.39           | 0.398 | 0.93             | 0.931 | 0.721 | 0.723 |
| 50/day max samples                           | 944           | 0.0502 | 0.0523 | 0.375          | 0.398 | 0.935            | 0.931 | 0.714 | 0.723 |
| 100/day max samples                          | 944           | 0.0515 | 0.0523 | 0.384          | 0.398 | 0.932            | 0.931 | 0.718 | 0.723 |
| 2.5% trimmed                                 | 930           | 0.0502 | 0.0516 | 0.431          | 0.416 | 0.933            | 0.935 | 0.75  | 0.73  |
| 5% trimmed                                   | 930           | 0.0496 | 0.0516 | 0.436          | 0.416 | 0.938            | 0.935 | 0.748 | 0.73  |
| 10% trimmed                                  | 921           | 0.0496 | 0.0517 | 0.397          | 0.413 | 0.933            | 0.936 | 0.726 | 0.735 |
| Key: Now. = nowcast; Comp. = comparison data |               |        |        |                |       |                  |       |       |       |

|     | Model                      | AIC   | BIC   | RMSE   |        |        |        | Spearman's Rho |       |       |       | 95% PrI coverage |       |       |       | AUC   |       |       |       |
|-----|----------------------------|-------|-------|--------|--------|--------|--------|----------------|-------|-------|-------|------------------|-------|-------|-------|-------|-------|-------|-------|
|     |                            |       |       | In-s.  | Now.   | Inf.   | FS     | In-s.          | Now.  | Inf.  | FS    | In-s.            | Now.  | Inf.  | FS    | In-s. | Now.  | Inf.  | FS    |
| MGB | Base model                 | -3493 | -3433 | 0.0451 | 0.0523 | 0.0645 | 0.047  | 0.523          | 0.398 | 0.333 | 0.44  | 0.949            | 0.929 | 0.873 | 0.933 | 0.785 | 0.723 | 0.722 | 0.754 |
|     | Outpatient only            | -3432 | -3358 | 0.0439 | 0.0494 | 0.0653 | 0.041  | 0.546          | 0.336 | 0.234 | 0.462 | 0.947            | 0.941 | 0.903 | 0.95  | 0.804 | 0.724 | 0.696 | 0.763 |
| LAC | Base model                 | -2660 | -2585 | 0.0335 | 0.039  | 0.0471 | 0.0458 | 0.649          | 0.556 | 0.394 | 0.573 | 0.954            | 0.912 | 0.837 | 0.884 | 0.843 | 0.784 | 0.772 | 0.724 |
|     | Symptom stratified         | -2005 | -1914 | 0.0326 | 0.0454 | 0.0507 | 0.0648 | 0.728          | 0.45  | 0.369 | 0.313 | 0.949            | 0.846 | 0.744 | 0.577 | 0.907 | 0.829 | 0.765 | 0.5   |
|     | Asymptomatic only          | -1986 | -1916 | 0.0335 | 0.0415 | 0.0497 | 0.0487 | 0.693          | 0.55  | 0.399 | 0.535 | 0.932            | 0.866 | 0.8   | 0.856 | 0.88  | 0.809 | 0.784 | 0.5   |
|     | Immunologically naive only | -2556 | -2500 | 0.0344 | 0.0401 | 0.0474 | 0.055  | 0.62           | 0.489 | 0.42  | 0.31  | 0.944            | 0.896 | 0.821 | 0.776 | 0.819 | 0.761 | 0.754 | 0.475 |

Key: In-s. = in-sample; Now. = nowcast; Inf. = inflection point; FS = fixed train-test split

32 **Table S6.** Summary of sensitivity analyses comparing performance of the base model in predicting epidemic growth rates using Ct  
33 values for LAC against models using only asymptomatic / unknown symptom status individuals, and using only immunologically naïve  
34 (no known vaccination or previous SARS-CoV-2 infection) individuals, including in-sample fits, nowcast performance, inflection period  
35 performance, and fit over the testing period with a single fixed train-test split. Metrics reported are RMSE of predicted vs. observed log  
36 incidence growth rates, Spearman's rank-order correlation coefficient for predicted vs. observed growth rates, proportion of observed  
37 growth rates falling within the 95% prediction interval, and AUC for epidemic direction predictions.

39 **Table S7.** Viral kinetics model parameters, descriptions and values used in each of the 5  
 40 synthetic datasets. Cells are shaded grey where assumed values differ to estimated values.  
 41 Values in “Ideal condition” are the maximum posterior probability estimates from fitting the  
 42 model. Bottom row shows the sampling delay distribution used for each scenario.

| Parameter                   | Description                                                                                                            | Ideal condition | Realistic kinetics | Clustered sampling | Realistic variation | Baseline condition (estimated value) |
|-----------------------------|------------------------------------------------------------------------------------------------------------------------|-----------------|--------------------|--------------------|---------------------|--------------------------------------|
| $t_p$                       | Days to peak viral load                                                                                                | 1.00 days       | 2.56 days          | 1.00 days          | 1.00 days           | 2.56 days                            |
| $c_p$                       | Minimum Ct value                                                                                                       | 15.0            | 25.0               | 15.0               | 15.0                | 25.0                                 |
| $c_s$                       | Ct value at inflection point                                                                                           | 31.6            | 31.6               | 31.6               | 31.6                | 31.6                                 |
| $t_s$                       | Days from peak to inflection point                                                                                     | 14.0 days       | 8.41 days          | 14.0 days          | 14.0 days           | 8.41 days                            |
| $t_c$                       | Days from inflection point to full clearance                                                                           | 45.6 days       | 45.6 days          | 45.6 days          | 45.6 days           | 45.6 days                            |
| $c_0$                       | Baseline Ct value at time of infection                                                                                 | 40.0            | 40.0               | 40.0               | 40.0                | 40.0                                 |
| $\sigma_{obs}$              | Unmodified variance of observed Ct values for a given time-since-infection                                             | 2.15            | 2.15               | 2.15               | 4.29                | 4.29                                 |
| $t_m$                       | Days to reach minimum variance in observed Ct values                                                                   | 12.1 days       | 12.1 days          | 12.1 days          | 12.1 days           | 12.1 days                            |
| $s_m$                       | Proportion reduction on variance at minimum (observation variance decreases from $\sigma_{obs}$ to $s_m\sigma_{obs}$ ) | 0.622           | 0.622              | 0.622              | 0.622               | 0.622                                |
| $p_c$                       | Daily probability of full clearance                                                                                    | 0.203           | 0.203              | 0.203              | 0.203               | 0.203                                |
| Sampling delay distribution |                                                                                                                        | Uniform(0,7)    | Uniform(0,7)       | Gamma(2,2)         | Uniform(0,7)        | Gamma(2,2)                           |



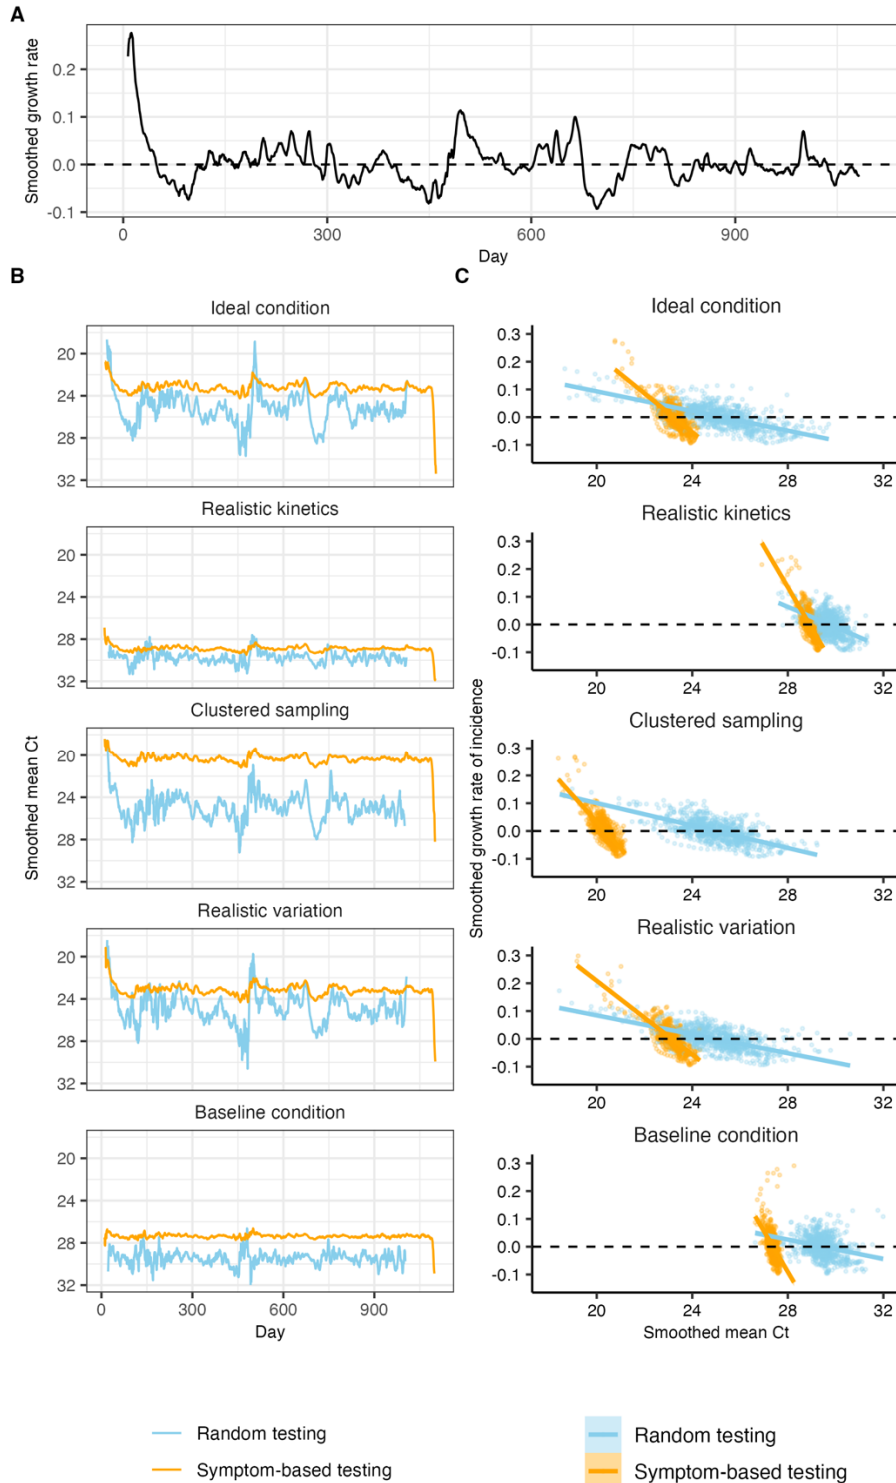

44

45 **Figure S1. (A)** 7-day rolling average growth rate of infections used for the simulations. **(B)**  
 46 Outputs of each synthetic dataset scenario showing the 7-day average mean Ct value reported  
 47 through the two surveillance strategies. **(C)** Scatterplot showing the relationship between 7-day  
 48 rolling average growth rates and 7-day rolling average mean Ct value for each scenario,  
 49 stratified by surveillance strategy. Solid lines show fitted linear regression models.

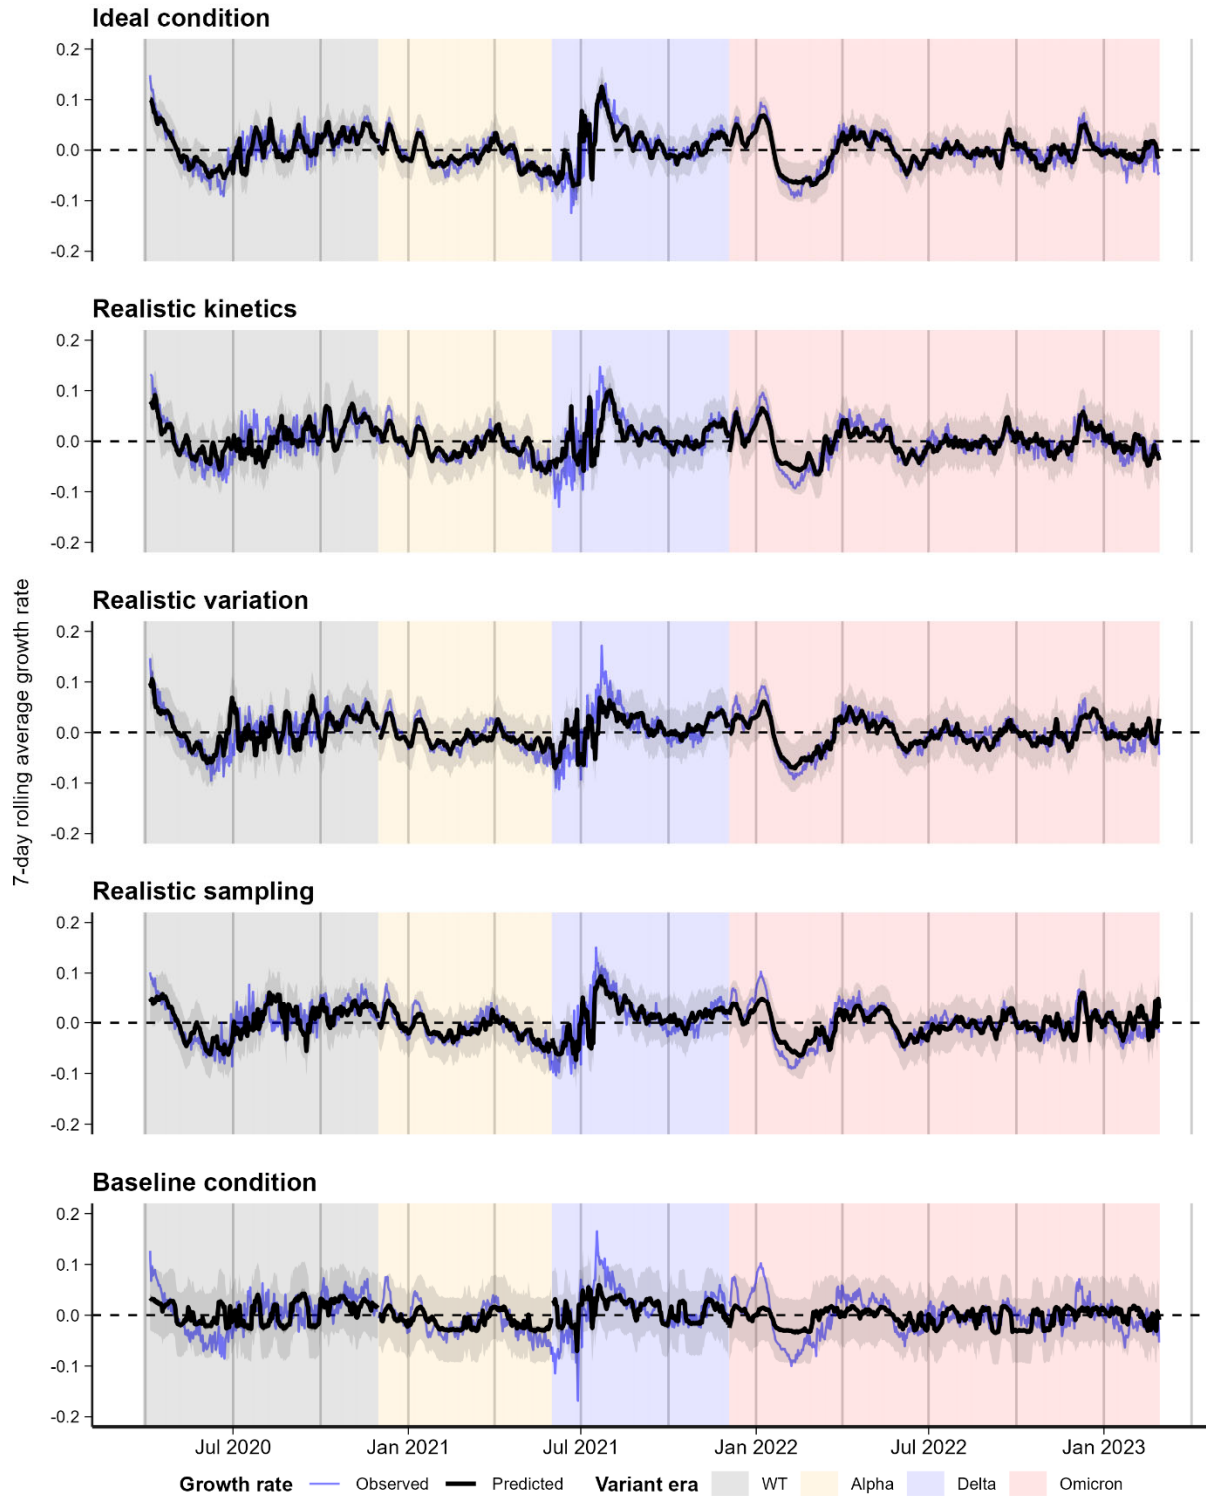

50

51 **Figure S2.** In-sample fits of the best-performing GAM model predicting epidemic growth rates  
 52 over time using only reported Ct values using the 5 synthetic datasets. Blue line shows true growth  
 53 rate of infections used for the simulation. Black lines and shaded region show model-predicted  
 54 growth rates and 95% confidence (dark shading) / prediction (light shading) intervals.

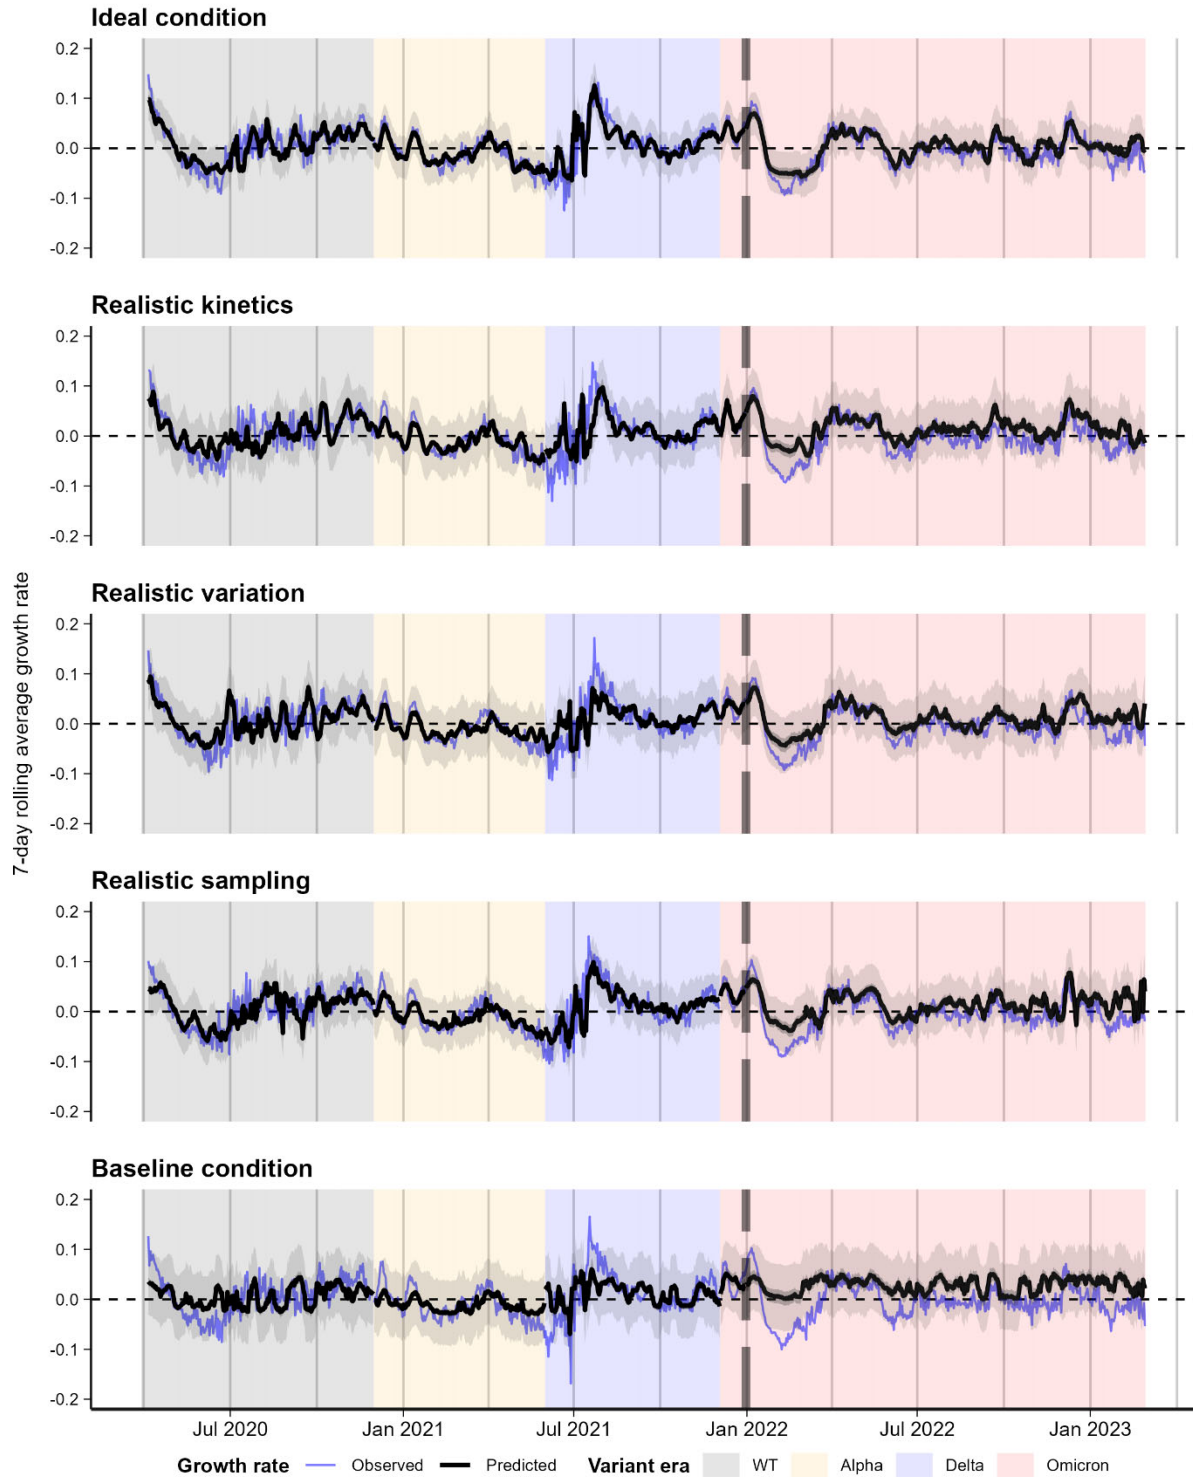

55

56 **Figure S3.** Training dataset fits (up to vertical dashed line) and test dataset predicted epidemic  
 57 growth rates over time using only reported Ct values using the 5 synthetic datasets. Results  
 58 shown are from the best-performing GAM model. Blue line shows true growth rate of infections  
 59 used for the simulation. Black lines and shaded region show model-predicted growth rates and  
 60 95% confidence (dark shading) / prediction (light shading) intervals.

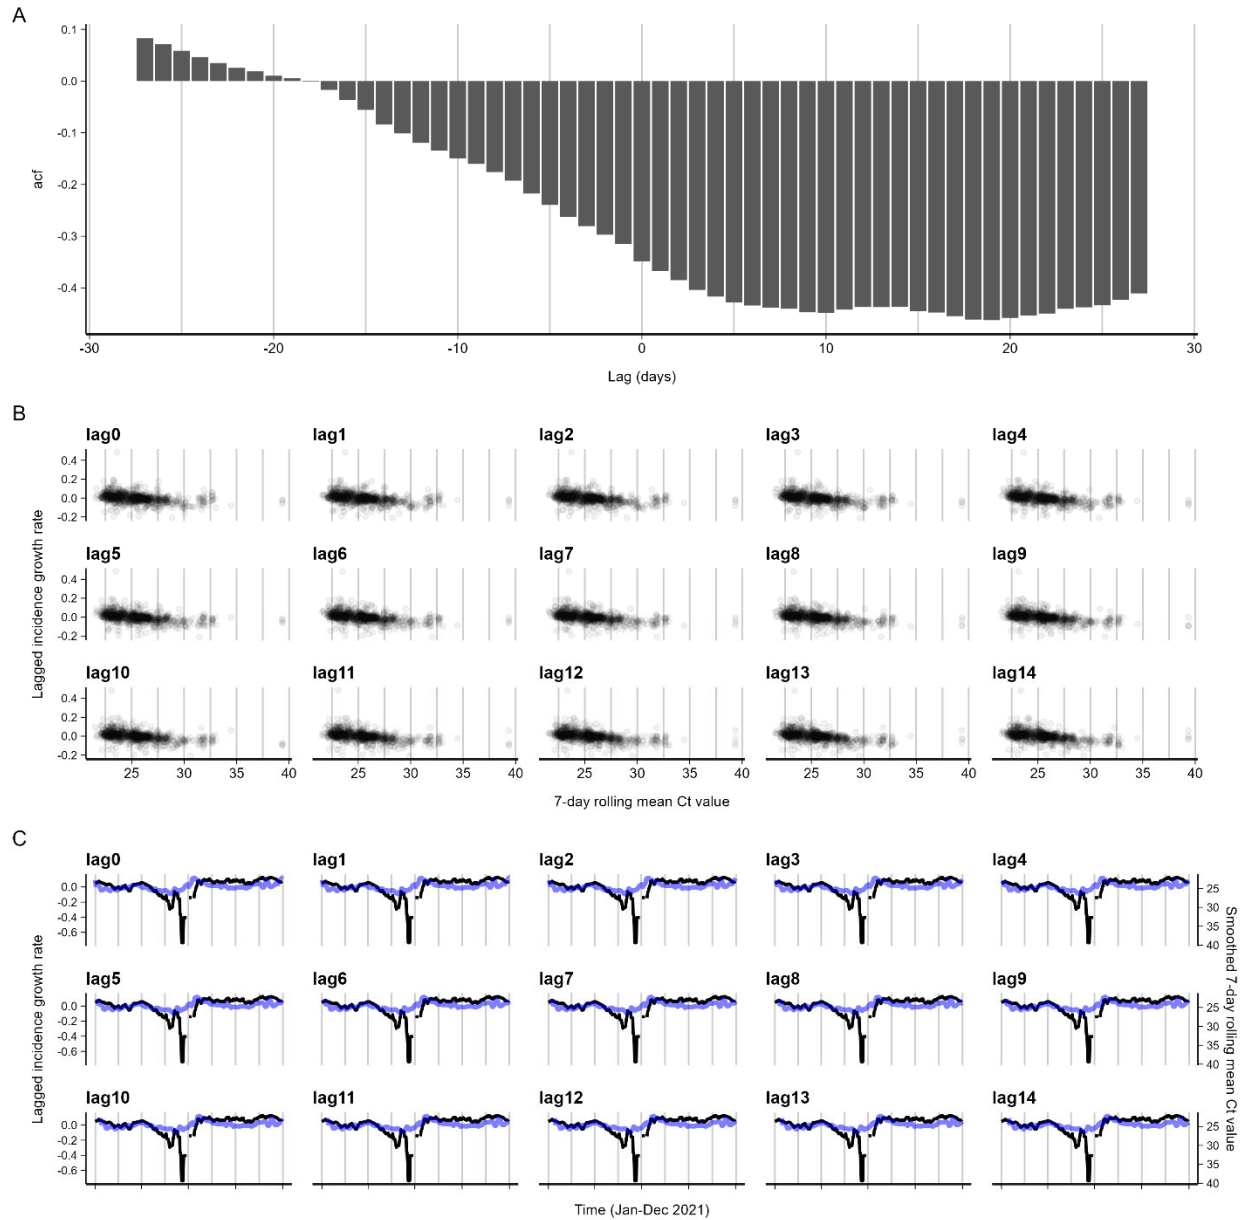

61

62 **Figure S4.** Cross-correlations between log incidence growth rates and mean Ct values at  
 63 different lead/lag times, for MGB data. **(A)** correlation strength, **(B)** scatterplots of daily observed  
 64 growth rate and mean Ct value at different lags, **(C)** growth rate and mean Ct value over time  
 65 with different time shifts for the Ct value curve.

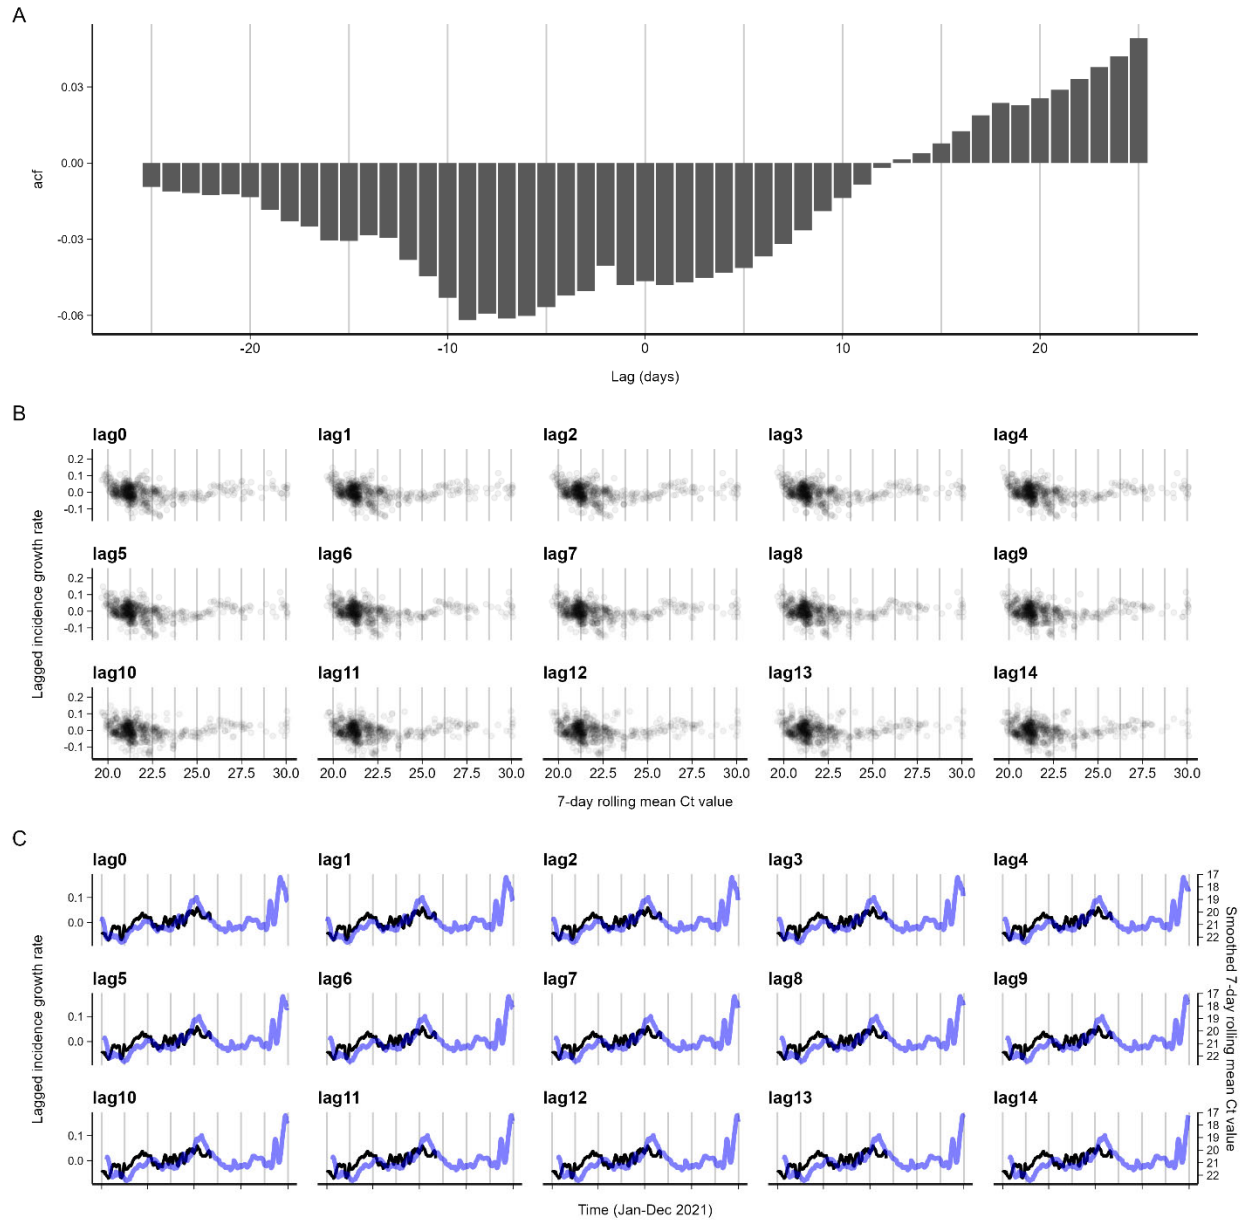

66

67 **Figure S5.** Cross-correlations between log incidence growth rates and mean Ct values at different  
 68 lead/lag times, for LAC data. **(A)** correlation strength, **(B)** scatterplots of daily observed growth  
 69 rate and mean Ct value, **(C)** growth rate and mean Ct value over time with different time shifts for  
 70 the Ct value curve.

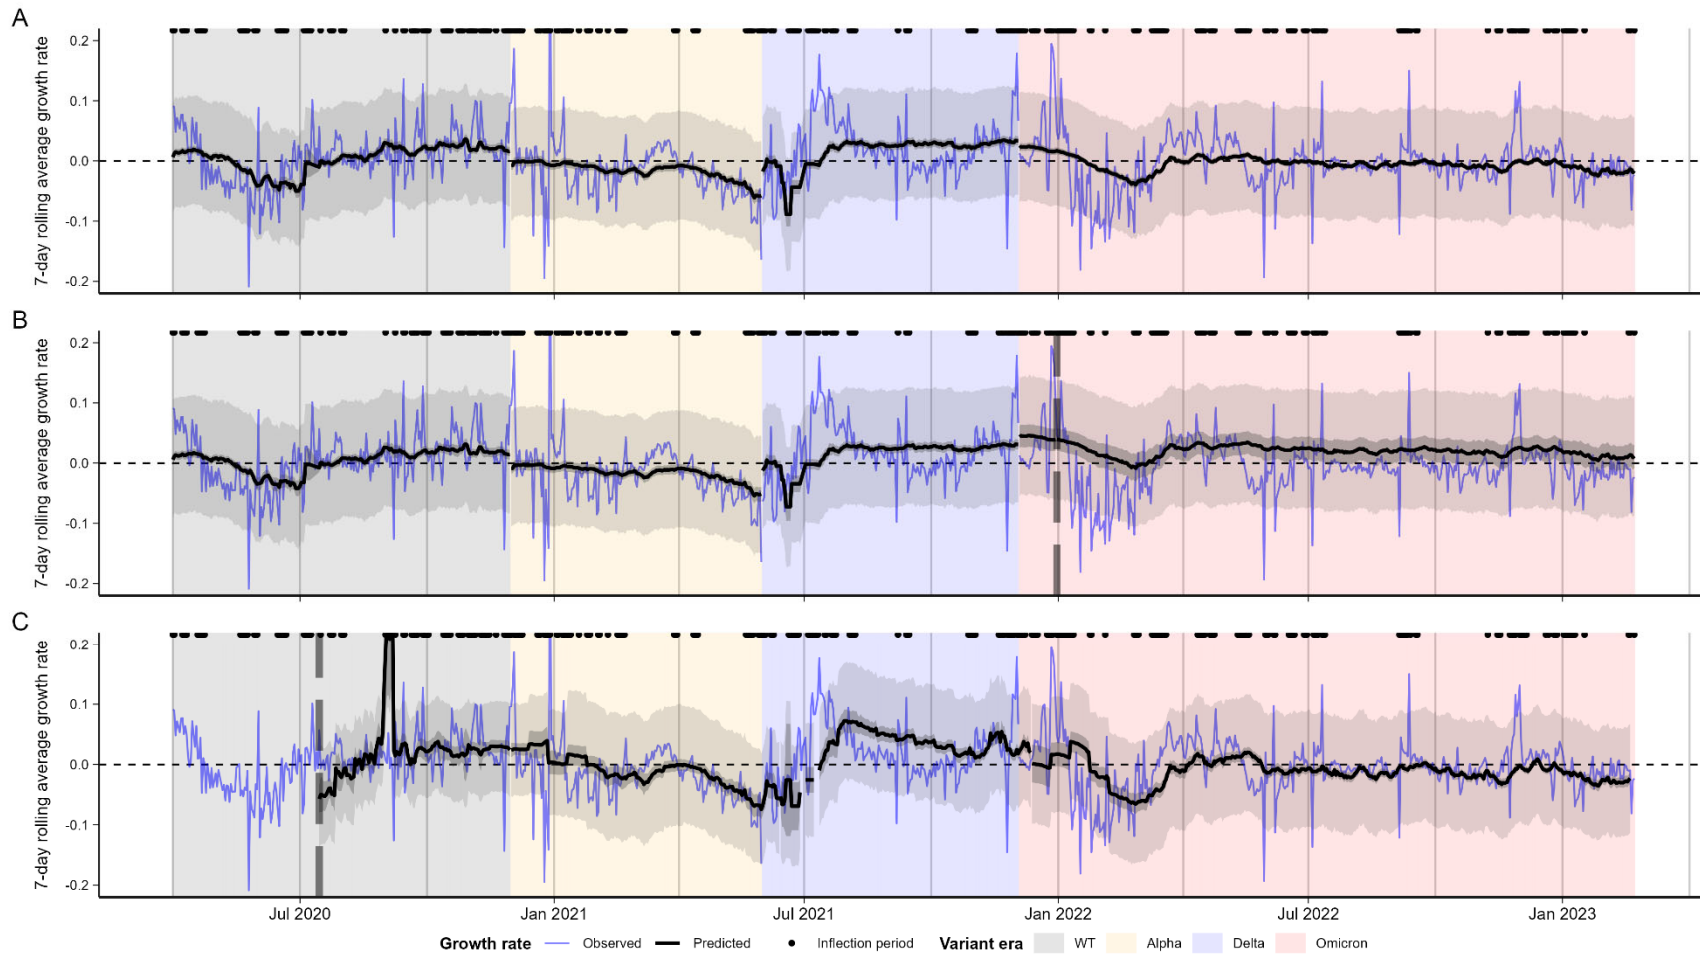

71

72 **Figure S6.** Model-predicted vs. observed log incidence growth rate for models fitted using the MGB data, showing **(A)** in-sample fits ,  
 73 **(B)** fit over the testing period with a single fixed train-test split shown by the vertical dashed line, and **(C)** two-week rolling nowcast fits,  
 74 starting at the vertical dashed line.

75

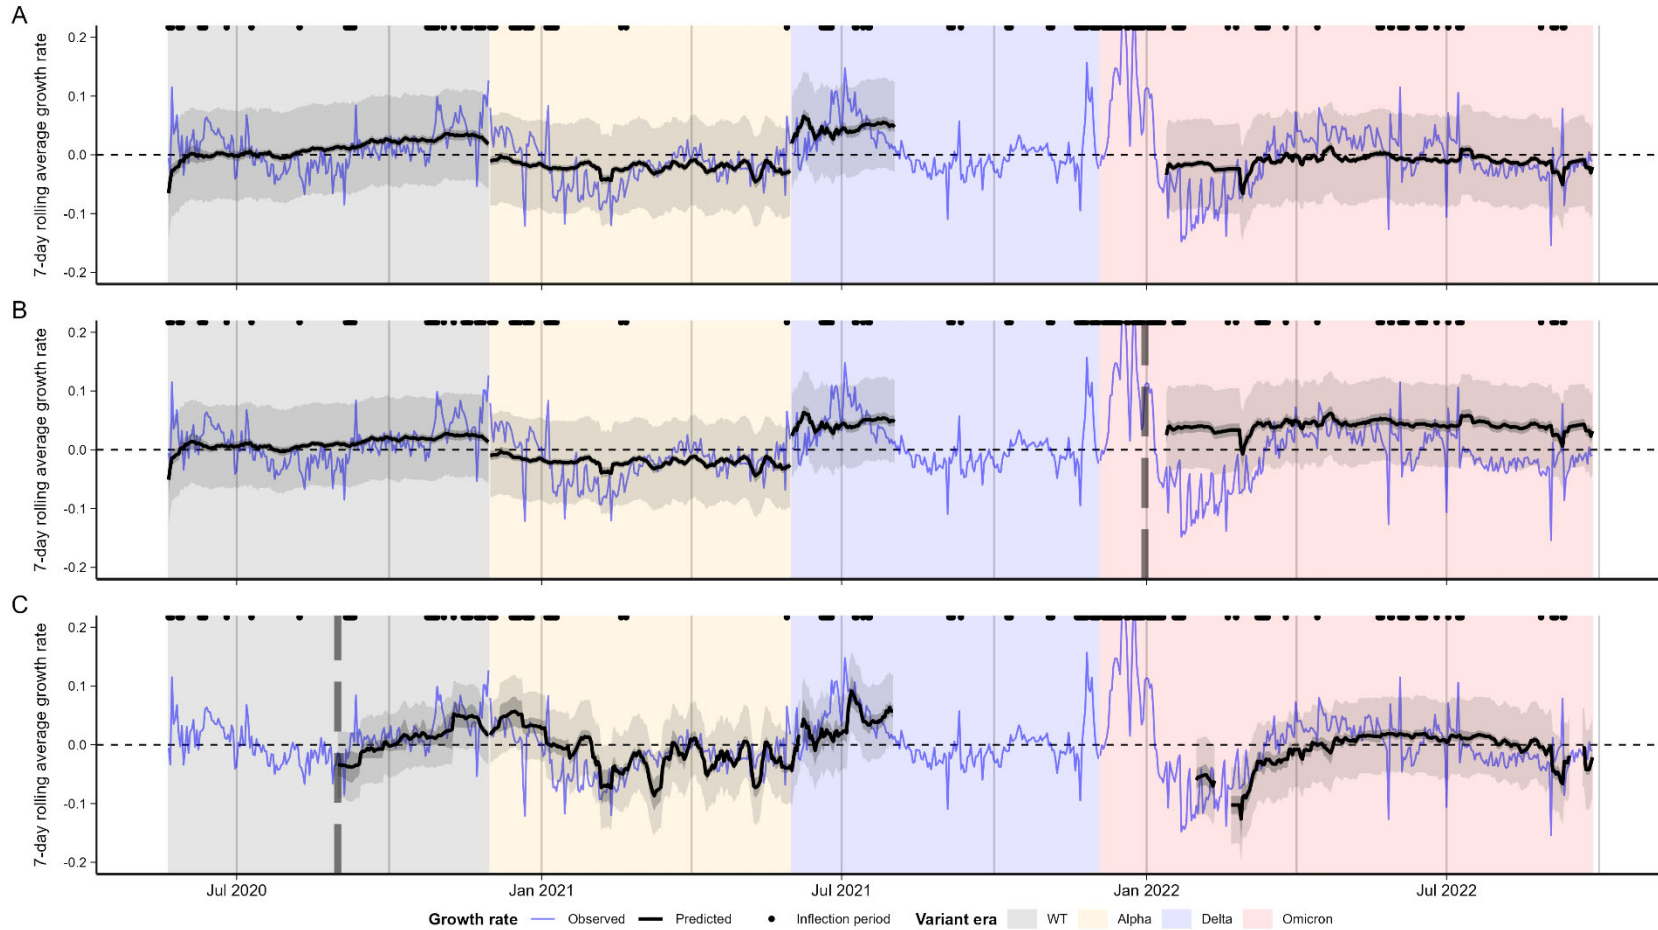

76

77 **Figure S7.** Model-predicted vs. observed log incidence growth rate for models fitted using the LAC data, showing **(A)** in-sample fits,  
 78 **(B)** fit over the testing period with a single fixed train-test split shown by the vertical dashed line, and **(C)** two-week rolling nowcast fits  
 79

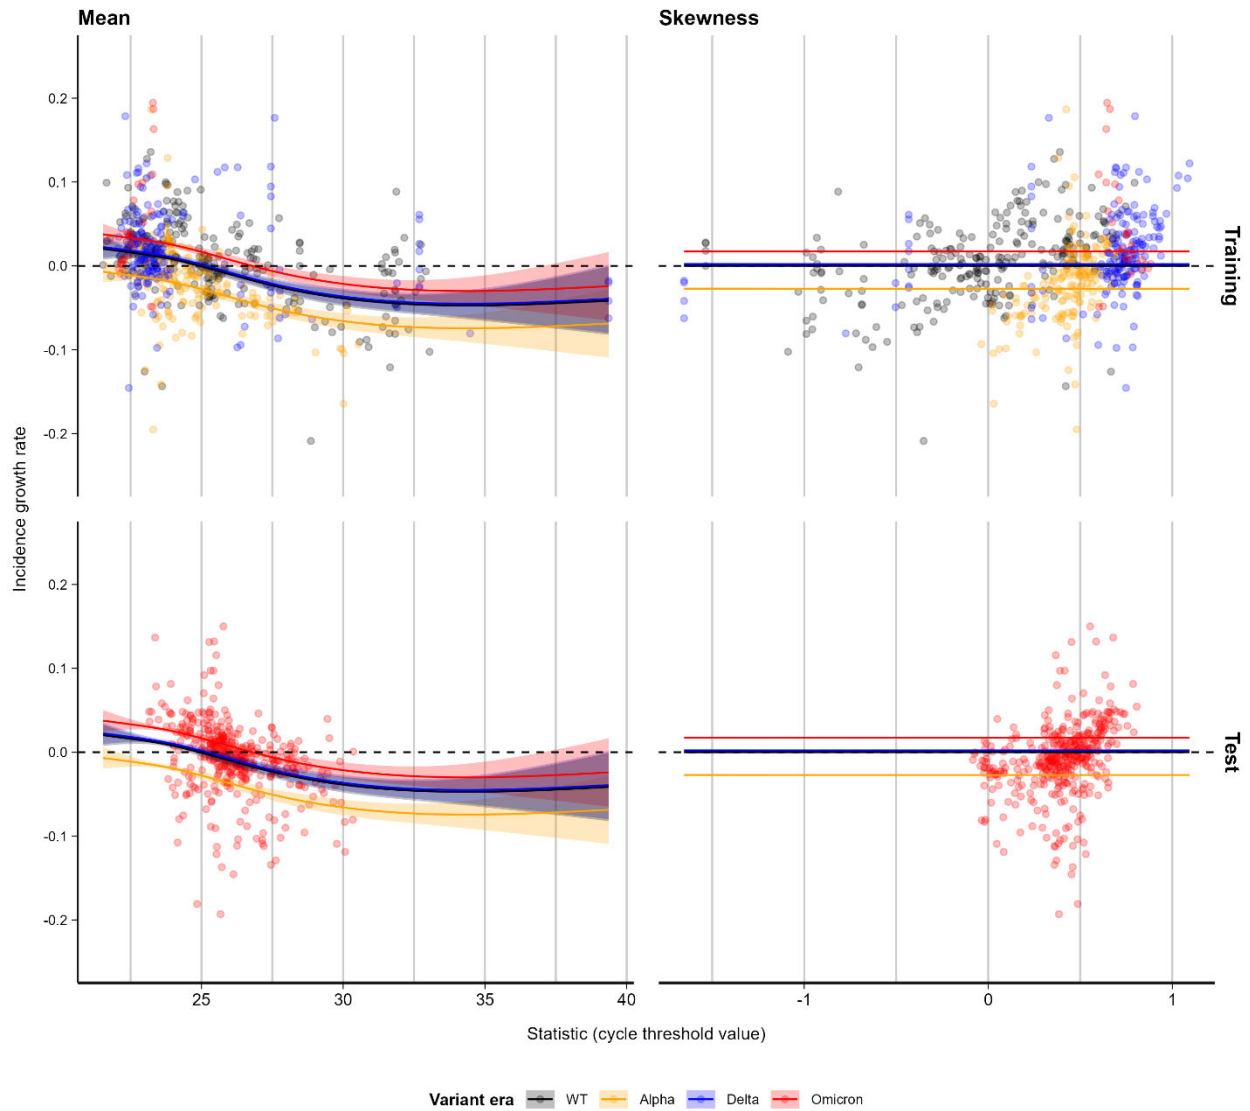

80

81 **Figure S8.** Best-fit lines (with standard errors) showing the modeled relationship between mean  
 82 (left) and skewness (right) in Ct values, by variant era, against growth rate for MGB data. Upper  
 83 panels show fit to training data with a fixed cutoff at 31 Dec 2021, while lower panels show the fit  
 84 of the trained model to data in the subsequent test period (01 Jan 2022 onward).



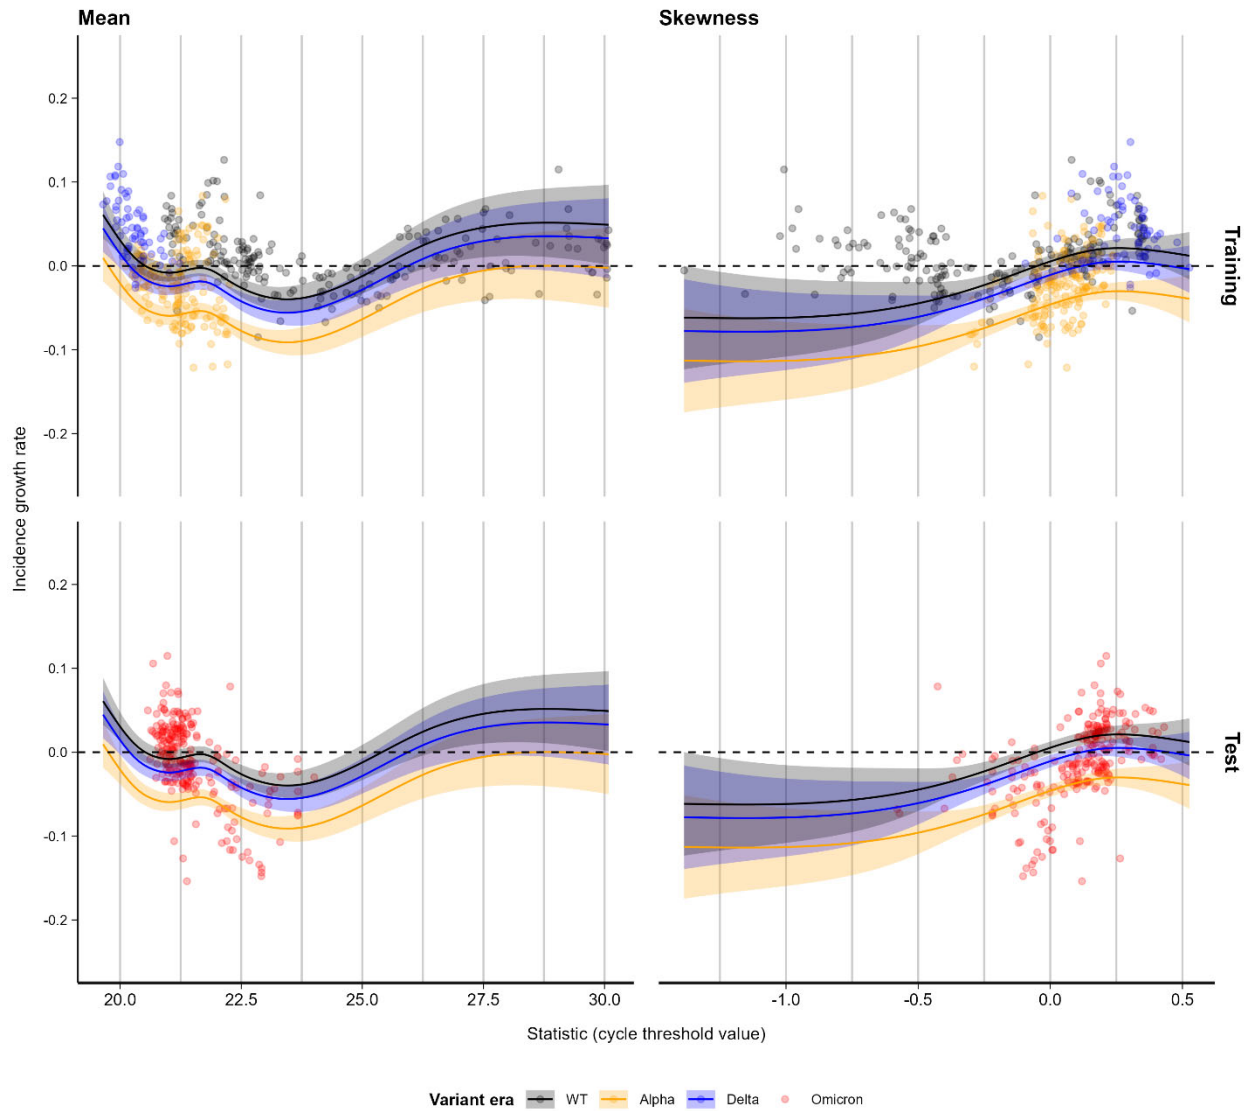

85

86 **Figure S9.** Best-fit lines (with standard errors) showing the modeled relationship between mean  
 87 (left) and skewness (right) in Ct values, by variant era, against growth rate for LAC data. Upper  
 88 panels show fit to training data with a fixed cutoff at 31 Dec 2021, while lower panels show the fit  
 89 of the trained model to data in the subsequent test period (01 Jan 2022 onward). Note the absence  
 90 of Omicron-era data from the training period.

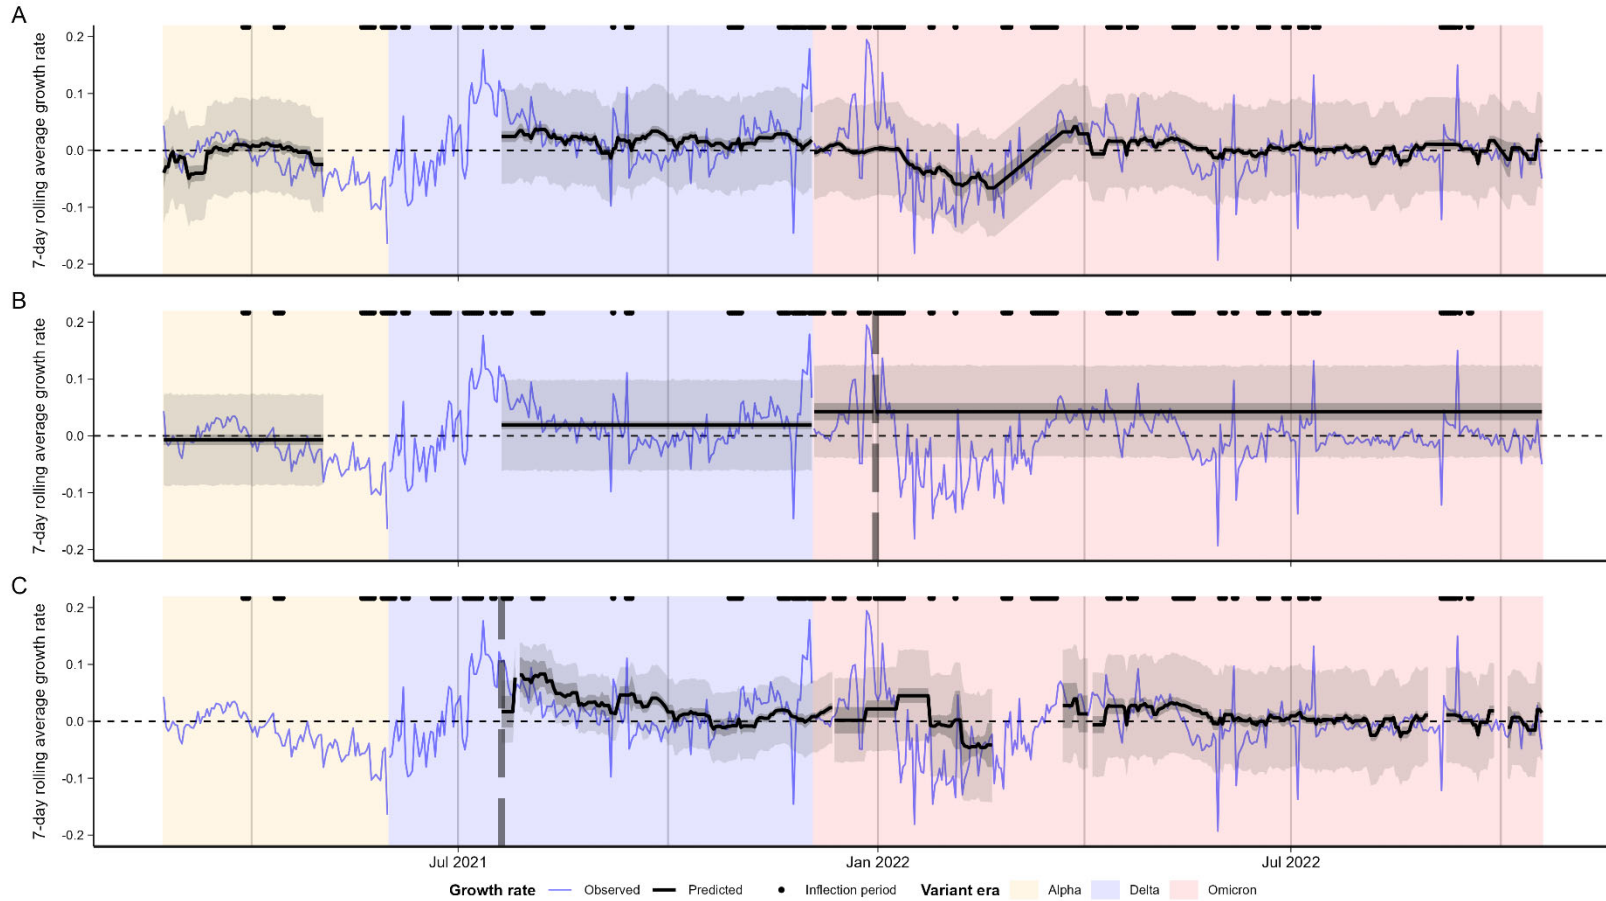

91

92 **Figure S10.** Model-predicted vs. observed log incidence growth rate for models fitted using the Tufts data, showing **(A)** in-sample fits,  
 93 **(B)** fit over the testing period with a single fixed train-test split shown by the vertical dashed line, and **(C)** two-week rolling nowcast fits  
 94 starting at the dashed vertical line.

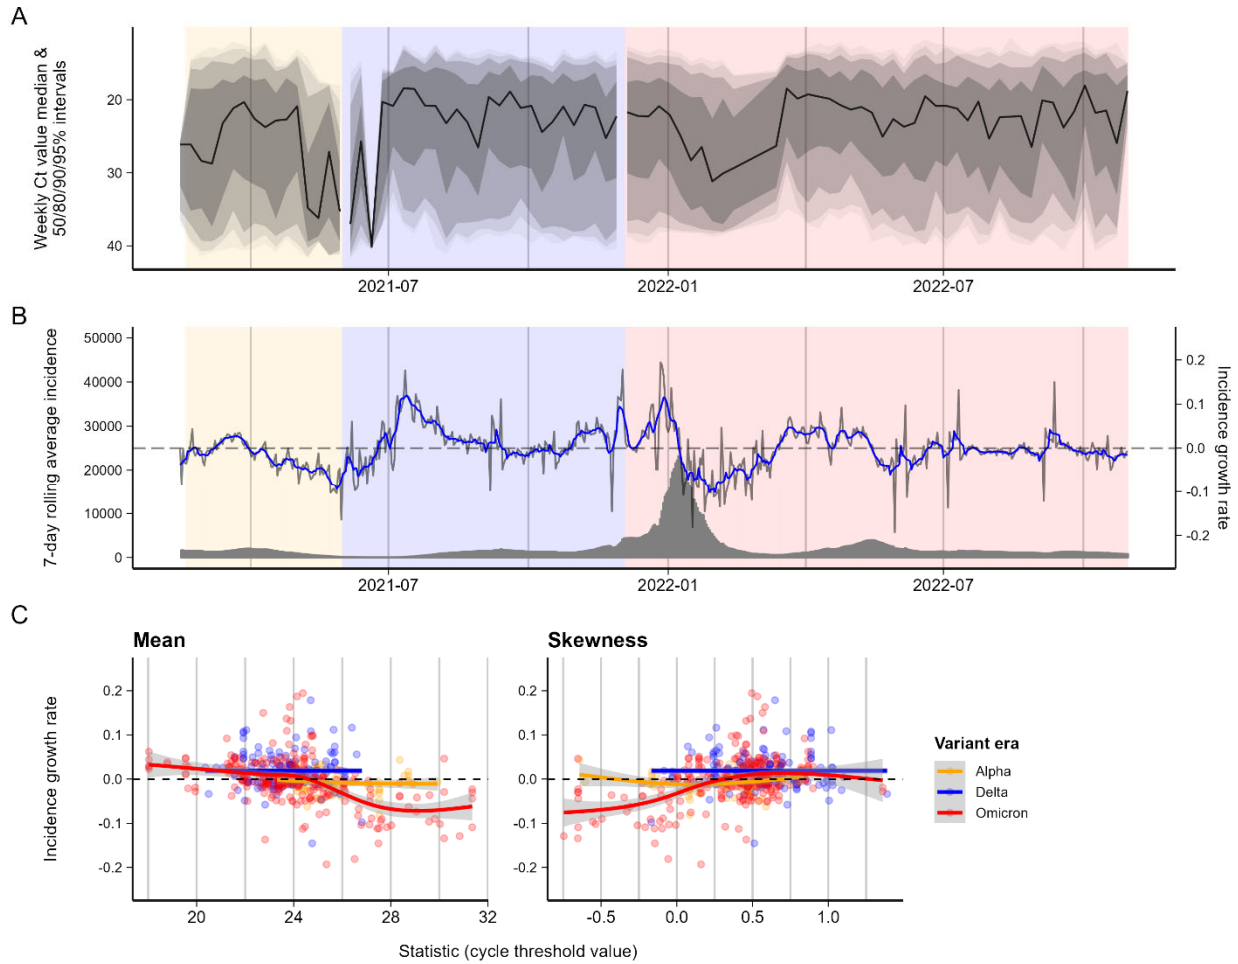

97 **Figure S11. (A)** Ct value distributions by week for the Tufts dataset. Solid line shows mean,  
98 shaded ribbons show 50% and 95% quantiles. **(B)** Incidence of COVID-19 cases and  
99 corresponding epidemic rates for Massachusetts, USA. Grey line shows growth rate of cases,  
100 whereas blue line shows 7-day rolling mean growth rate. **(C)** Relationship between Ct value  
101 means and skewness against epidemic growth rates.

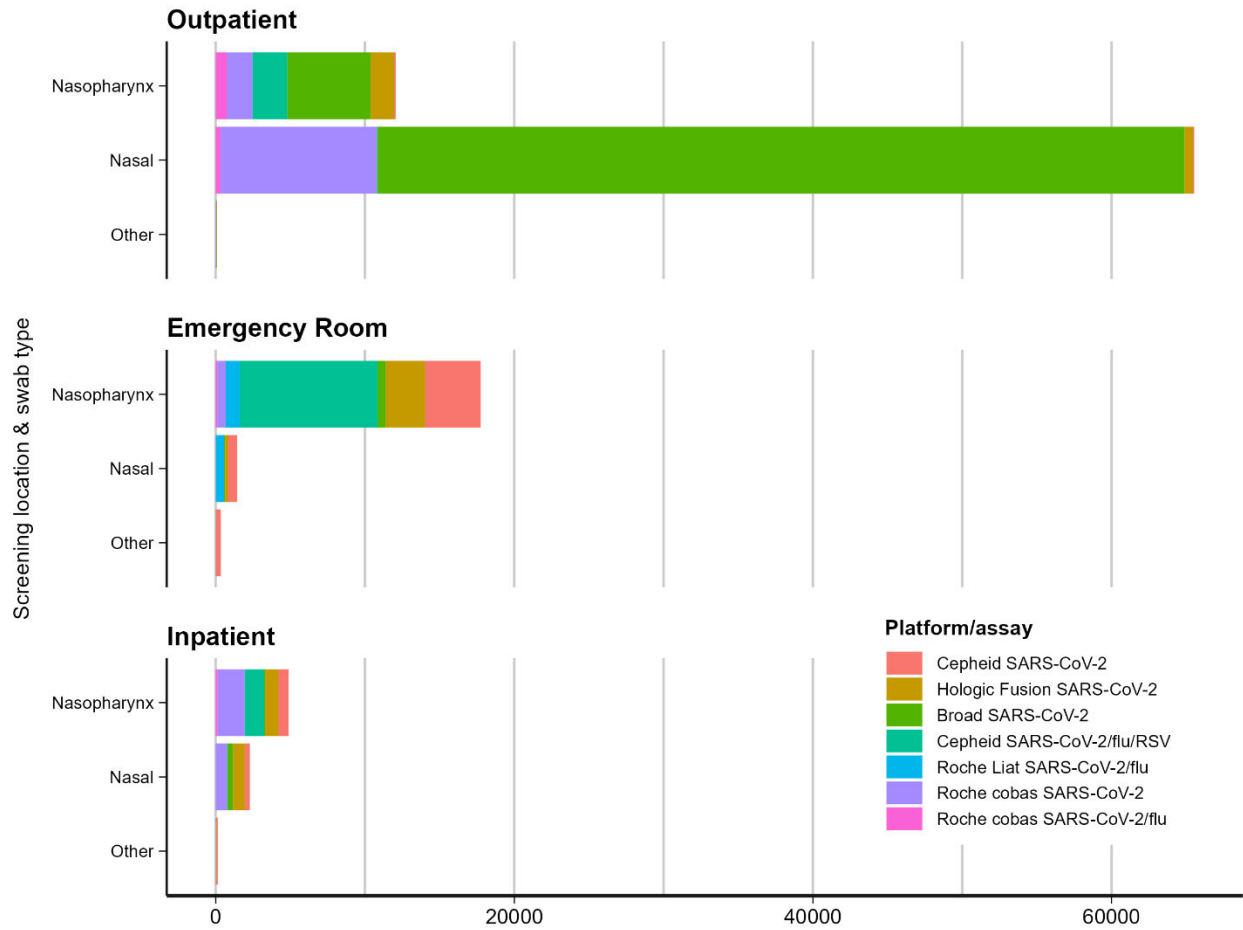

104

105 **Figure S12.** Distribution of test results included in the MGB dataset, broken down by screening  
 106 location (outpatient pre-procedural screening, ER testing, inpatient testing), swab type  
 107 (nasopharyngeal vs. nasal vs. other), and PCR platform / assay used for analysis.

108

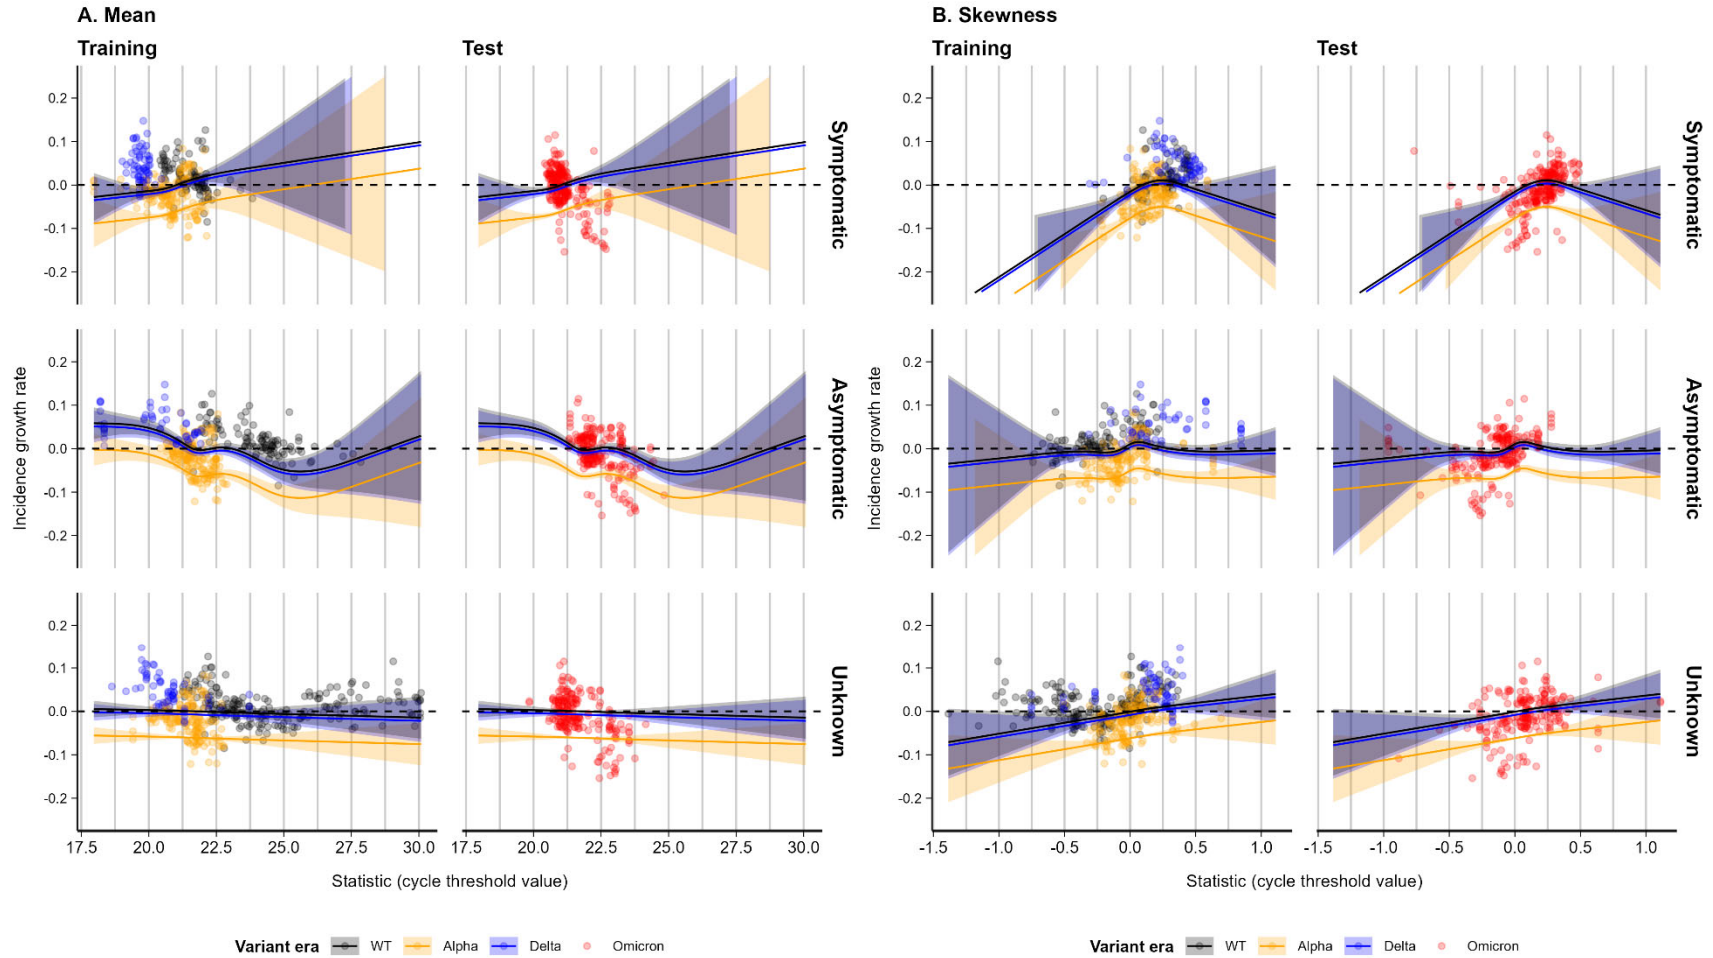

109

110 **Figure S13.** Best-fit lines (with standard errors) showing the modeled relationship between mean (left) and skewness (right) in Ct  
 111 values against growth rate, stratified by reported symptom status, for LAC data, up to 31 Dec 2021 (training period) and after (test  
 112 period). Note the differing relationships by symptom status stratum.

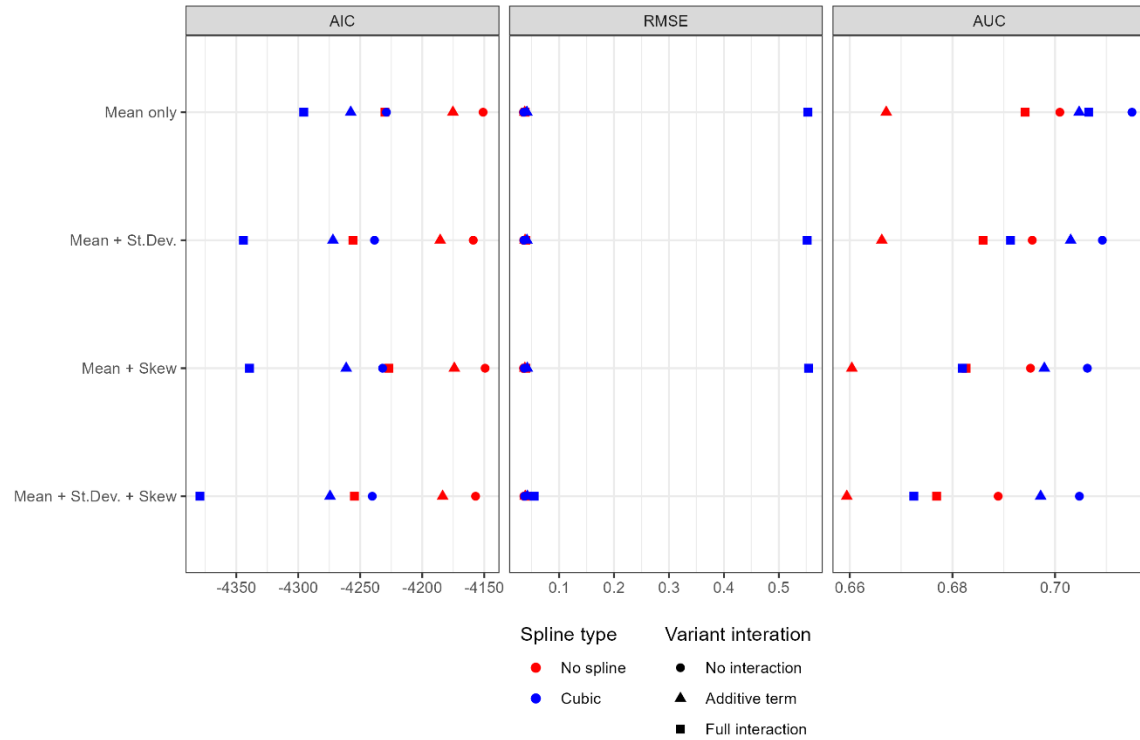

113

114 **Figure S14.** Comparison of predictive performance (RMSE and AUC) for the 24 tested models.

115

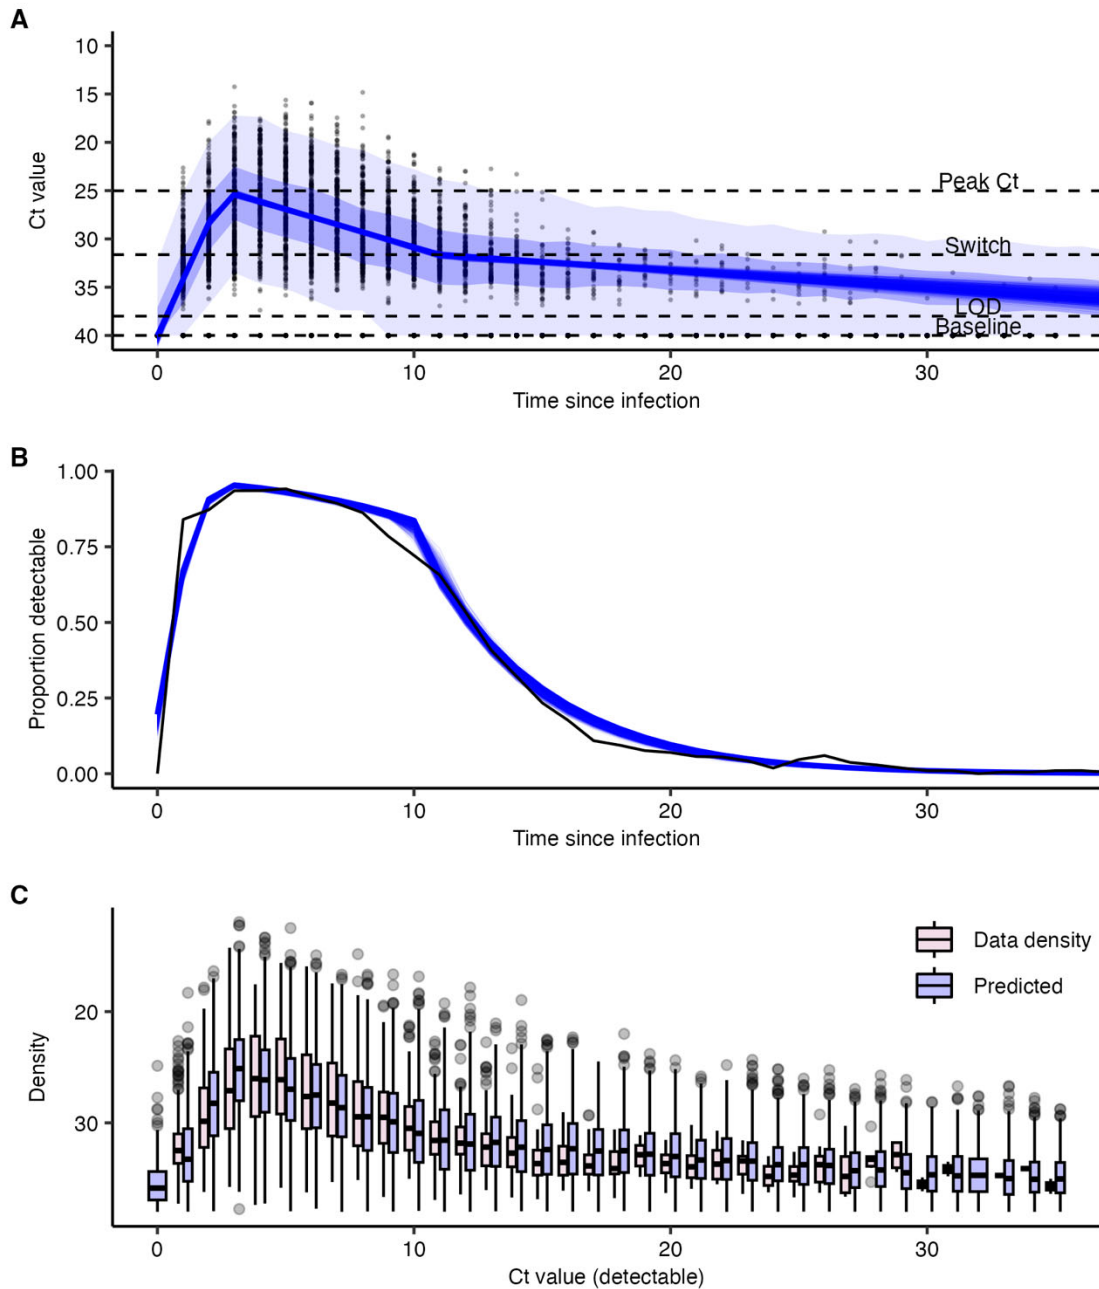

116

117 **Figure S15.** Viral kinetics model fitted to longitudinal SARS-CoV-2 RT-qPCR testing data  
 118 following a previous negative test. **(A)** Solid blue lines show 1000 posterior draws of the mean Ct  
 119 value over time. Shaded envelope shows 50% and 95% quantiles. Horizontal lines show control  
 120 points used to parameterize the model. **(B)** Solid blue lines show 1000 posterior draws for the  
 121 model-predicted proportion of positive tests over time-since infection overlaid on empirical  
 122 proportion detectable. **(C)** Box plots for the posterior distribution of observed Ct values on each  
 123 day post infection (blue) compared to distribution of raw data (red).

124

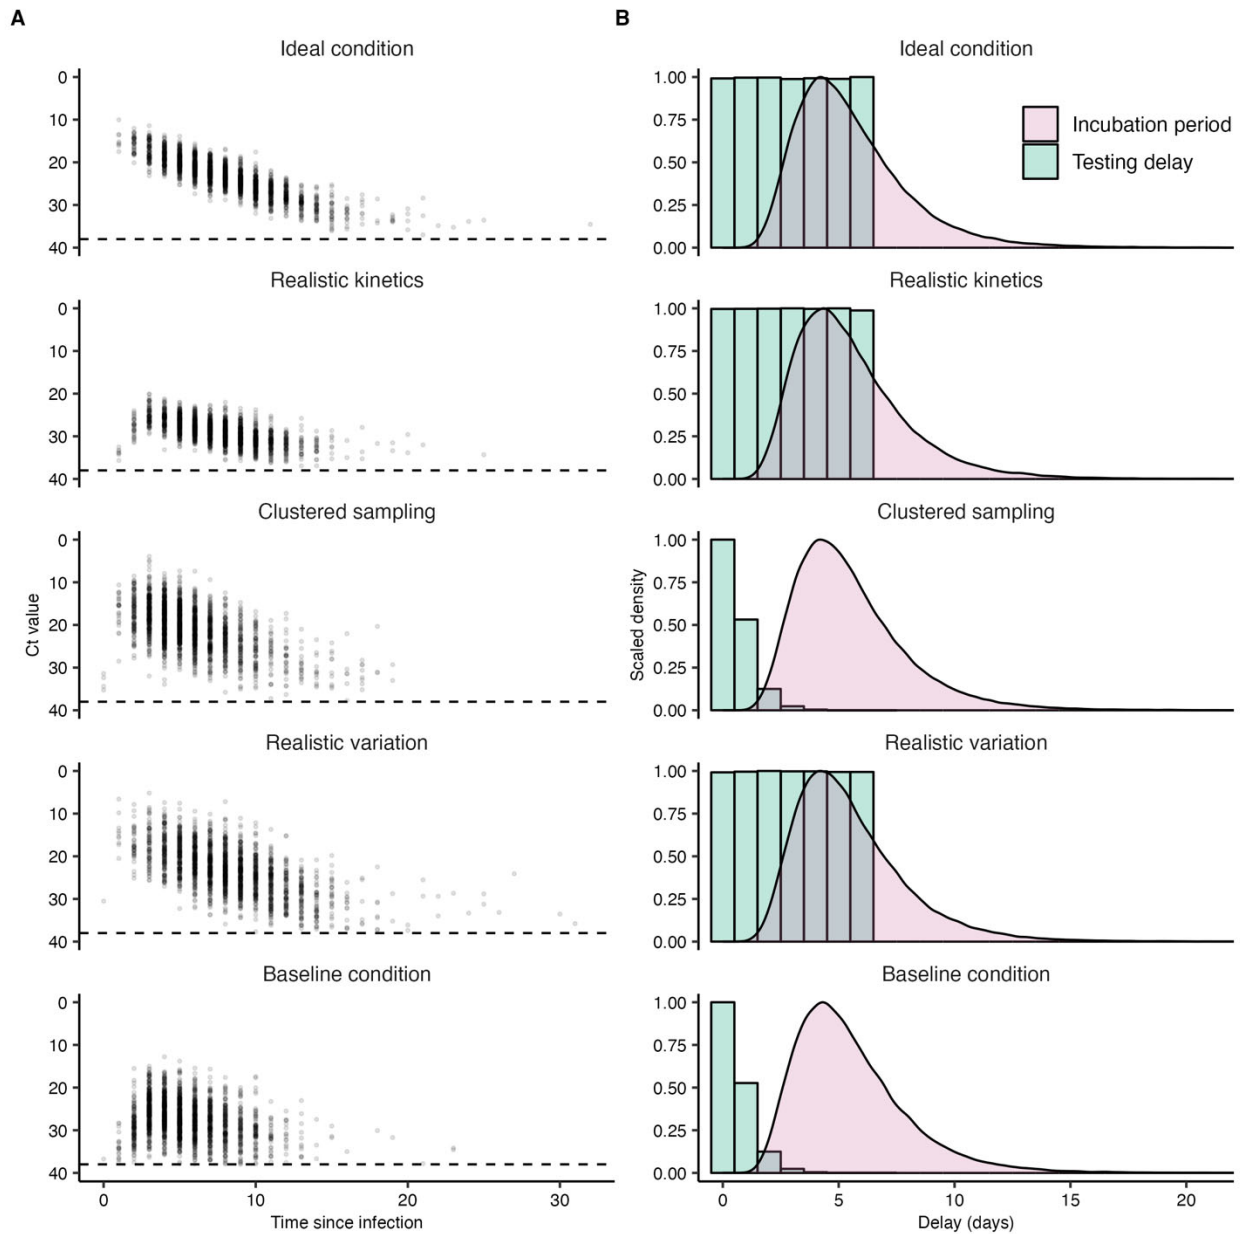

125

126 **Figure S16. (A)** Randomly simulated Ct values for the 5 synthetic data scenarios. “Baseline  
 127 condition” shows the Ct value distribution as estimated from fitting to the longitudinal testing  
 128 data, whereas the other scenarios show assumed Ct value distributions after changing some  
 129 parameters. **(B)** Assumed incubation period distribution (red) and sampling delay distribution  
 130 (green) for each scenario.



## 131 **Supplementary Text 1 – Synthetic datasets**

### 132 *1. Viral kinetics model*

133 We adapted a previously published viral kinetics model describing the mean and distribution of  
134 Ct values over time-since-infection<sup>21</sup>. Our simulations do not need to track individual infections,  
135 and thus unlike other published viral kinetics model<sup>25,40,48,55</sup>, our model describes only the mean  
136 and variance of Ct values for all infections given time-since-infection rather than modeling each  
137 individual's viral trajectory. Model parameters and interpretation are shown in **Table S6**.

138 We used a piecewise linear model of the form:

$$139 \quad f(t) = \begin{cases} c_0, & t \leq 0 \\ \mu t + c_0, & 0 < t \leq t_p \\ c_p - \omega_1(t - t_p) + c_0, & t_p < t \leq t_p + t_s \\ c_s - \omega_2(t - t_p - t_s) + c_0, & t > t_p + t_s \end{cases}$$

140 Where  $c_0$  is the true baseline Ct value at time of infection;  $\mu = \frac{c_p - c_0}{t_p}$  is the Ct value growth rate;

141  $c_p$  is the minimum Ct value;  $t_p$  is the time from infection to minimum Ct value;  $\omega_1 = \frac{c_p - c_s}{t_s}$  is the

142 initial clearance rate;  $c_s$  is the Ct value at which waning switches to a second, slower clearance

143 rate;  $\omega_2 = \frac{c_p - c_0}{t_c}$  is the second, slower clearance rate;  $t_c$  is the time taken to decay from  $c_s$  to  $c_0$ .

144 We model the distribution of observed Ct values around the mean Ct value ( $f(t)$ ) to capture three  
145 observations:

- 146 1. Ct values are highly varied on a given day post infection.
- 147 2. The variance of the Ct distribution is not necessarily constant over time.
- 148 3. Most individuals clear their infections quickly, but a small proportion remain detectable at  
149 a very high Ct value for many days after infection.

150

151 The distribution of observed Ct values on a given day post infection is modeled as a truncated  
 152 Normal distribution:

153 
$$C(t) \sim N(f(t), \sigma(t))_0^{38}$$

154 Where  $N$  is the normal distribution. We assumed the distribution was truncated between 0 and 38  
 155 based on the distribution of observed Ct values in the NBA dataset.  $f(t)$  is the mean of the Normal  
 156 distribution and  $\sigma(t)$  is the time-varying variance given by:

157 
$$\sigma(t) = \begin{cases} \sigma_{obs}, & t < t_p + t_s \\ \sigma_{obs} \left(1 - \frac{1 - s_m}{t_m} (t - t_p - t_s)\right), & t_p + t < t \leq t_p + t_s + t_m \\ s_m \sigma_{obs}, & t > t_p + t_s + t_m \end{cases}$$

158  $\sigma_{obs}$  gives the variance. The second term describes a gradually decreasing variance during the  
 159 second clearance phase, declining at a constant rate over duration  $t_m$  before reaching a minimum  
 160 of  $s_m \sigma_{obs}$ .

161 In addition, the probability of a sample having a detectable sample on a given day following  
 162 infection is the product of two probabilities: the probability of having a Ct value less than the limit  
 163 of detection, given by the cumulative density of the Normal distribution; and the probability of  
 164 having not cleared the infection by that day:

165 
$$\phi(t) = P[C(t) < c_0] (1 - p_c)^{t - t_p + t_s}$$

166 The first part of the equation gives the cumulative density of the Normal distribution. The second  
 167 part describes an additional process, whereby each day from  $t_p + t_s$  onwards there is a daily  
 168 probability,  $p_c$ , of becoming fully undetectable, representing clearance of the infection.

169 *2. Parameterizing the base model*

170 We parameterized the viral kinetics model using publicly available longitudinal data from the  
171 National Basketball Association (NBA) <sup>48</sup>. These data were a convenience sample from daily  
172 testing of NBA players, staff, and other affiliates over the course of the pandemic. Clinical samples  
173 were combined anterior nares and oropharynx swabs (collected separately from each anatomical  
174 site and combined in a single tube). Samples were tested using the Roche Cobas target 1 assay  
175 to give Ct values against the ORF1ab gene target. For this analysis, we used only tests from  
176 infections where the first positive sample was preceded by a negative test, intended to capture  
177 viral kinetics immediately following infection. Furthermore, as our objective was only to simulate  
178 a realistic model for the distribution of Ct values over time-since-infection, we did not stratify the  
179 data by covariates such as age group, symptom status, vaccination status or variant. Ultimately,  
180 we fit our model to 3,627 positive samples and 8,252 negative samples, representing 403 distinct  
181 infection episodes with samples taken between day 0 and 51 following a previous negative test.

182 We used a Markov chain Monte Carlo algorithm <sup>56</sup> to estimate posterior distributions for the model  
183 parameters conditional on the NBA dataset using uninformative uniform priors for the model  
184 parameters and a likelihood function based on the model described above. We ran 3 chains for  
185 150,000 iterations, discarding the first 50,000 iterations as burn in. High effective sample sizes  
186 ( $>1000$ ) and  $\hat{R}$  values  $<1.1$  were obtained for all estimated parameters. We used the maximum *a*  
187 *posteriori* estimates as point estimates for the simulations. Model fits are shown in **Figure S15**.

188 *3. Simulated surveillance data*

189 We simulated Ct values observed under a realistic surveillance system using the following  
190 algorithm:

- 191 1. Infection times were simulated for  $N=2,000,000$  individuals (the cumulative incidence of  
192 cases in Massachusetts) by drawing infection times from the 7-day rolling mean reported  
193 incidence of cases from Massachusetts.
- 194 2. Two surveillance strategies were simulated giving each individual two possible sampling  
195 times:
- 196 a. Random cross-sectional testing, representing detection of symptomatic infections.  
197 Uniformly distributed sampling dates were simulated for each infection. The time-  
198 since-infection was given as the difference between the sampling date and  
199 infection date (thus, many individuals were sampled before they became infected  
200 or long after they cleared their infection). All individuals are assigned one random  
201 sampling time.
- 202 b. Symptom-based surveillance was simulated by assuming all infected individuals  
203 became symptomatic (note that it is not important to reflect the true symptomatic  
204 fraction for SARS-CoV-2, as we are only interested in generating a large number  
205 of simulated Ct values). Each symptomatic individual was assigned a randomly  
206 generated incubation period drawn from a log-normal distribution with mean =  
207 1.621 and standard deviation = 0.41 on the log scale . For symptom-based  
208 surveillance, each symptomatic individual was additionally given a sampling delay  
209 drawn from a distribution. An individual's sampling date was given as their infection  
210 date, plus their incubation period, plus their sampling delay.
- 211 3. Expected Ct value at their sampling time were calculated using the viral kinetics model  
212 described above combined with the MAP estimates from the model fitting.
- 213 4. Time to full clearance was simulated for each individual from a negative binomial  
214 distribution with success probability  $p_c$ .

215 5. Finally, observed Ct values were simulated from a normal distribution with mean given by  
216 the expected Ct value given time-since-infection and the time-dependent variance as  
217 described above. If the simulated Ct value is greater than the limit of detection or the  
218 individual had already fully cleared the infection, then the Ct value was set to 40.

#### 219 *4. Synthetic data scenarios*

220 To understand how the relationship between observed Ct values and true growth rate of infection  
221 incidence varies across different scenarios, we implemented 5 different scenarios. We start with  
222 the “Ideal” scenario, which modifies the simulation parameters to provide an unrealistic scenario  
223 where we expect to see a consistent and clear relationship between surveillance Ct values and  
224 incidence growth rates. We then return each of these simulation parameters to realistic values  
225 one at a time to understand which factors confound our ability to infer growth rates from  
226 surveillance Ct values.

227 Scenarios:

- 228 1. Ideal conditions: assuming that viral kinetics are extremely left-skewed (very fast growth  
229 phase relative to clearance phase), that there is little variation in observed Ct values given  
230 time-since-infection, and that the delay from symptom onset to sampling time is uniformly  
231 distributed between 0 and 7 days.
- 232 2. Realistic viral kinetics: using the viral kinetics parameter estimates from fitting the model,  
233 but with half the variation in observed Ct values given time-since-infection and uniformly  
234 distributed sampling delays.
- 235 3. Realistic variation: using an extremely left-skewed viral kinetics curve and uniformly  
236 distributed sampling delays, but with the variance of the Ct value distribution given time-  
237 since-infection based on the model estimates.

238 4. Realistic sampling: using an extremely left-skewed viral kinetics curve and reduced  
239 variance in observed Ct values, but assuming that sampling delays are gamma-distributed  
240 with a mean of 4 days and variance of 8 days.

241 5. Realistic scenario: using the viral kinetics parameter estimates and variance from fitting  
242 the model, and assuming that sampling delays are gamma-distributed with a mean of 4  
243 days and variance of 8 days.

244 **Figure S16** shows the assumed viral kinetics models, and incubation and sampling delay  
245 distributions used for each of the scenarios. **Figure S1** shows the assumed epidemic growth rate  
246 curve, and the resulting mean Ct values over time through the two surveillance systems.

247
